# Supplementary material
Source: HighWire-hosted journal article supplement (https://mentalhealth.bmj.com/content/23/4/135)
Supplement: inline-supplementary-material-1 [file inline-supplementary-material-1.pdf]

## SUPPLEMENTAL MATERIAL

### APPENDIX 1

#### Search strategy, search terms/syntax for AMASU-A.

##### PUBMED

("obesity"[MeSH Terms] OR "obesity"[All Fields]) OR ("obesity"[MeSH Terms] OR "obesity"[All Fields] OR "obese"[All Fields]) OR ("overweight"[MeSH Terms] OR "overweight"[All Fields]) OR ("overweight"[MeSH Terms] OR "overweight"[All Fields] OR ("over"[All Fields] AND "weight"[All Fields]) OR "over weight"[All Fields]) OR ("dyslipidemias"[MeSH Terms] OR "dyslipidemias"[All Fields] OR "dyslipidemia"[All Fields]) OR ("diabetes mellitus"[MeSH Terms] OR ("diabetes"[All Fields] AND "mellitus"[All Fields]) OR "diabetes mellitus"[All Fields] OR "diabetes"[All Fields] OR "diabetes insipidus"[MeSH Terms] OR ("diabetes"[All Fields] AND "insipidus"[All Fields]) OR "diabetes insipidus"[All Fields]) OR diabetic[All Fields] OR ("thyroid diseases"[MeSH Terms] OR ("thyroid"[All Fields] AND "diseases"[All Fields]) OR "thyroid diseases"[All Fields] OR ("thyroid"[All Fields] AND "disorder"[All Fields]) OR "thyroid disorder"[All Fields]) OR ("thyroid diseases"[MeSH Terms] OR ("thyroid"[All Fields] AND "diseases"[All Fields]) OR "thyroid diseases"[All Fields] OR ("thyroid"[All Fields] AND "disorders"[All Fields]) OR "thyroid disorders"[All Fields]) OR ("coronary disease"[MeSH Terms] OR ("coronary"[All Fields] AND "disease"[All Fields]) OR "coronary disease"[All Fields] OR ("coronary"[All Fields] AND "heart"[All Fields] AND "disease"[All Fields]) OR "coronary heart disease"[All Fields]) OR ("coronary disease"[MeSH Terms] OR ("coronary"[All Fields] AND "disease"[All Fields]) OR "coronary disease"[All Fields] OR ("coronary"[All Fields] AND "heart"[All Fields] AND "diseases"[All Fields]) OR "coronary heart diseases"[All Fields]) OR ("death, sudden, cardiac"[MeSH Terms] OR ("death"[All Fields] AND "sudden"[All Fields] AND "cardiac"[All Fields]) OR "cardiac sudden death"[All Fields] OR ("sudden"[All Fields] AND "cardiac"[All Fields] AND "death"[All Fields]) OR "sudden cardiac death"[All Fields]) OR ("cerebrovascular disorders"[MeSH Terms] OR ("cerebrovascular"[All Fields] AND "disorders"[All Fields]) OR "cerebrovascular disorders"[All Fields] OR ("cerebrovascular"[All Fields] AND "disease"[All Fields]) OR "cerebrovascular disease"[All Fields] OR ("cerebrovascular disorders"[MeSH Terms] OR ("cerebrovascular"[All Fields] AND "disorders"[All Fields]) OR "cerebrovascular disorders"[All Fields] OR ("cerebrovascular"[All Fields] AND "diseases"[All Fields]) OR "cerebrovascular diseases"[All Fields]) OR (cerebro[All Fields] AND ("vascular diseases"[MeSH Terms] OR ("vascular"[All Fields] AND "diseases"[All Fields]) OR "vascular diseases"[All Fields] OR ("vascular"[All Fields] AND "disease"[All Fields]) OR "vascular disease"[All Fields])) OR (cerebro[All Fields] AND ("vascular diseases"[MeSH Terms] OR ("vascular"[All Fields] AND "diseases"[All Fields]) OR "vascular diseases"[All Fields])) OR (("cerebrum"[MeSH Terms] OR "cerebrum"[All Fields] OR "cerebral"[All Fields] OR "brain"[MeSH Terms] OR "brain"[All Fields]) AND ("vascular diseases"[MeSH Terms] OR ("vascular"[All Fields] AND "diseases"[All Fields]) OR "vascular diseases"[All Fields] OR ("vascular"[All Fields] AND "disease"[All Fields]) OR "vascular disease"[All Fields])) OR (((cerebrum"[MeSH Terms] OR "cerebrum"[All Fields] OR "cerebral"[All Fields] OR "brain"[MeSH Terms] OR "brain"[All Fields]) AND ("vascular diseases"[MeSH Terms] OR ("vascular"[All Fields] AND "diseases"[All Fields]) OR "vascular diseases"[All Fields])) OR ("hypertension"[MeSH Terms] OR "hypertension"[All Fields]) OR hypertensive[All Fields] OR ("myocarditis"[MeSH Terms]

OR "myocarditis"[All Fields]) OR ("angina pectoris"[MeSH Terms] OR ("angina"[All Fields] AND "pectoris"[All Fields]) OR "angina pectoris"[All Fields] OR "angina"[All Fields]) OR ("transient ischaemic attack"[All Fields] OR "ischemic attack, transient"[MeSH Terms] OR ("ischemic"[All Fields] AND "attack"[All Fields] AND "transient"[All Fields]) OR "transient ischemic attack"[All Fields] OR ("transient"[All Fields] AND "ischemic"[All Fields] AND "attack"[All Fields])) OR ("transient ischaemic attacks"[All Fields] OR "ischemic attack, transient"[MeSH Terms] OR ("ischemic"[All Fields] AND "attack"[All Fields] AND "transient"[All Fields]) OR "transient ischemic attack"[All Fields] OR ("transient"[All Fields] AND "ischemic"[All Fields] AND "attacks"[All Fields]) OR "transient ischemic attacks"[All Fields]) OR ("transient ischaemic attack"[All Fields] OR "ischemic attack, transient"[MeSH Terms] OR ("ischemic"[All Fields] AND "attack"[All Fields] AND "transient"[All Fields]) OR "transient ischemic attack"[All Fields] OR ("transient"[All Fields] AND "ischemic"[All Fields] AND "attack"[All Fields])) OR ("transient ischaemic attacks"[All Fields] OR "ischemic attack, transient"[MeSH Terms] OR ("ischemic"[All Fields] AND "attack"[All Fields] AND "transient"[All Fields]) OR "transient ischemic attack"[All Fields] OR ("transient"[All Fields] AND "ischemic"[All Fields] AND "attacks"[All Fields]) OR "transient ischemic attacks"[All Fields]) OR ("heart failure"[MeSH Terms] OR ("heart"[All Fields] AND "failure"[All Fields]) OR "heart failure"[All Fields]) OR ("peripheral arterial disease"[MeSH Terms] OR ("peripheral"[All Fields] AND "arterial"[All Fields] AND "disease"[All Fields]) OR "peripheral arterial disease"[All Fields] OR ("peripheral"[All Fields] AND "artery"[All Fields] AND "disease"[All Fields]) OR "peripheral artery disease"[All Fields]) OR ("peripheral arterial disease"[MeSH Terms] OR ("peripheral"[All Fields] AND "arterial"[All Fields] AND "disease"[All Fields]) OR "peripheral arterial disease"[All Fields] OR ("peripheral"[All Fields] AND "artery"[All Fields] AND "diseases"[All Fields]) OR "peripheral artery diseases"[All Fields]) OR ("cardiomyopathy, hypertrophic"[MeSH Terms] OR ("cardiomyopathy"[All Fields] AND "hypertrophic"[All Fields]) OR "hypertrophic cardiomyopathy"[All Fields] OR ("hypertrophic"[All Fields] AND "cardiomyopathy"[All Fields])) OR ("pneumonia"[MeSH Terms] OR "pneumonia"[All Fields]) OR ("asthma"[MeSH Terms] OR "asthma"[All Fields]) OR ("asthma"[MeSH Terms] OR "asthma"[All Fields] OR "asthmatic"[All Fields]) OR ("pulmonary disease, chronic obstructive"[MeSH Terms] OR ("pulmonary"[All Fields] AND "disease"[All Fields] AND "chronic"[All Fields] AND "obstructive"[All Fields]) OR "chronic obstructive pulmonary disease"[All Fields] OR ("chronic"[All Fields] AND "obstructive"[All Fields] AND "pulmonary"[All Fields] AND "disease"[All Fields])) OR ("Chronic Obstr Pulm Dis"[Journal] OR ("chronic"[All Fields] AND "obstructive"[All Fields] AND "pulmonary"[All Fields] AND "diseases"[All Fields]) OR "chronic obstructive pulmonary diseases"[All Fields]) OR ("pulmonary disease, chronic obstructive"[MeSH Terms] OR ("pulmonary"[All Fields] AND "disease"[All Fields] AND "chronic"[All Fields] AND "obstructive"[All Fields]) OR "chronic obstructive pulmonary disease"[All Fields] OR "copd"[All Fields]) OR ("obstructive sleep apnoea syndrome"[All Fields] OR "sleep apnea, obstructive"[MeSH Terms] OR ("sleep"[All Fields] AND "apnea"[All Fields] AND "obstructive"[All Fields]) OR "obstructive sleep apnea"[All Fields] OR ("obstructive"[All Fields] AND "sleep"[All Fields] AND "apnea"[All Fields] AND "syndrome"[All Fields]) OR "obstructive sleep apnea syndrome"[All Fields]) OR ("influenza, human"[MeSH Terms] OR ("influenza"[All Fields] AND "human"[All Fields]) OR "human influenza"[All Fields] OR "influenza"[All Fields]) OR ("liver diseases"[MeSH Terms] OR ("liver"[All Fields] AND "diseases"[All Fields]) OR "liver diseases"[All Fields] OR ("liver"[All Fields] AND "disease"[All Fields]) OR "liver disease"[All Fields]) OR ("liver diseases"[MeSH Terms] OR ("liver"[All Fields] AND "diseases"[All Fields]) OR "liver diseases"[All Fields]) OR ("gastrointestinal diseases"[MeSH Terms] OR ("gastrointestinal"[All Fields] AND

"diseases"[All Fields]) OR "gastrointestinal diseases"[All Fields] OR ("functional"[All Fields] AND "gastrointestinal"[All Fields] AND "disorder"[All Fields]) OR "functional gastrointestinal disorder"[All Fields] OR ("gastrointestinal diseases"[MeSH Terms] OR ("gastrointestinal"[All Fields] AND "diseases"[All Fields]) OR "gastrointestinal diseases"[All Fields] OR ("functional"[All Fields] AND "gastrointestinal"[All Fields] AND "disorders"[All Fields]) OR "functional gastrointestinal disorders"[All Fields]) OR ("colitis, ulcerative"[MeSH Terms] OR ("colitis"[All Fields] AND "ulcerative"[All Fields]) OR "ulcerative colitis"[All Fields] OR ("ulcerative"[All Fields] AND "colitis"[All Fields])) OR ("crohn disease"[MeSH Terms] OR ("crohn"[All Fields] AND "disease"[All Fields]) OR "crohn disease"[All Fields] OR ("crohn's"[All Fields] AND "disease"[All Fields]) OR "crohn's disease"[All Fields]) OR ("crohn disease"[MeSH Terms] OR ("crohn"[All Fields] AND "disease"[All Fields]) OR "crohn disease"[All Fields]) OR ("gastroesophageal reflux"[MeSH Terms] OR ("gastroesophageal"[All Fields] AND "reflux"[All Fields]) OR "gastroesophageal reflux"[All Fields] OR ("gastroesophageal"[All Fields] AND "reflux"[All Fields] AND "disease"[All Fields]) OR "gastroesophageal reflux disease"[All Fields]) OR ("gastroesophageal reflux"[MeSH Terms] OR ("gastroesophageal"[All Fields] AND "reflux"[All Fields]) OR "gastroesophageal reflux"[All Fields]) AND ("disease"[MeSH Terms] OR "disease"[All Fields] OR "diseases"[All Fields])) OR ("gastroesophageal reflux"[MeSH Terms] OR ("gastroesophageal"[All Fields] AND "reflux"[All Fields]) OR "gastroesophageal reflux"[All Fields] OR "gerd"[All Fields]) OR ("pancreatitis, chronic"[MeSH Terms] OR ("pancreatitis"[All Fields] AND "chronic"[All Fields]) OR "chronic pancreatitis"[All Fields] OR ("chronic"[All Fields] AND "pancreatitis"[All Fields])) OR ("kidney diseases"[MeSH Terms] OR ("kidney"[All Fields] AND "diseases"[All Fields]) OR "kidney diseases"[All Fields] OR ("kidney"[All Fields] AND "disease"[All Fields]) OR "kidney disease"[All Fields] OR ("kidney diseases"[MeSH Terms] OR ("kidney"[All Fields] AND "diseases"[All Fields]) OR "kidney diseases"[All Fields]) OR ("acute kidney injury"[MeSH Terms] OR ("acute"[All Fields] AND "kidney"[All Fields] AND "injury"[All Fields]) OR "acute kidney injury"[All Fields]) OR ("acute kidney injury"[MeSH Terms] OR ("acute"[All Fields] AND "kidney"[All Fields] AND "injury"[All Fields]) OR "acute kidney injury"[All Fields] OR ("acute"[All Fields] AND "kidney"[All Fields] AND "injuries"[All Fields]) OR "acute kidney injuries"[All Fields]) OR ("renal dialysis"[MeSH Terms] OR ("renal"[All Fields] AND "dialysis"[All Fields]) OR "renal dialysis"[All Fields] OR "dialysis"[All Fields] OR "dialysis"[MeSH Terms]) OR ("prostatic hyperplasia"[MeSH Terms] OR ("prostatic"[All Fields] AND "hyperplasia"[All Fields]) OR "prostatic hyperplasia"[All Fields] OR ("benign"[All Fields] AND "prostatic"[All Fields] AND "hyperplasia"[All Fields]) OR "benign prostatic hyperplasia"[All Fields]) OR ("kidney calculi"[MeSH Terms] OR ("kidney"[All Fields] AND "calculi"[All Fields]) OR "kidney calculi"[All Fields] OR ("kidney"[All Fields] AND "stone"[All Fields]) OR "kidney stone"[All Fields] OR ("kidney calculi"[MeSH Terms] OR ("kidney"[All Fields] AND "calculi"[All Fields]) OR "kidney calculi"[All Fields] OR ("kidney"[All Fields] AND "stones"[All Fields]) OR "kidney stones"[All Fields]) OR ("osteoporosis, postmenopausal"[MeSH Terms] OR ("osteoporosis"[All Fields] AND "postmenopausal"[All Fields]) OR "postmenopausal osteoporosis"[All Fields] OR "osteoporosis"[All Fields] OR "osteoporosis"[MeSH Terms]) OR ("fractures, bone"[MeSH Terms] OR ("fractures"[All Fields] AND "bone"[All Fields]) OR "bone fractures"[All Fields] OR "fracture"[All Fields]) OR ("fractures, bone"[MeSH Terms] OR ("fractures"[All Fields] AND "bone"[All Fields]) OR "bone fractures"[All Fields] OR "fractures"[All Fields]) OR ("lymphoma"[MeSH Terms] OR "lymphoma"[All Fields]) OR ("anaemia"[All Fields] OR "anemia"[MeSH Terms] OR "anemia"[All Fields]) OR ("anaemias"[All Fields] OR "anemia"[MeSH Terms] OR "anemia"[All Fields] OR "anemias"[All Fields]) OR ("anaemia"[All Fields] OR

"anemia"[MeSH Terms] OR "anemia"[All Fields] OR ("anaemias"[All Fields] OR "anemia"[MeSH Terms] OR "anemia"[All Fields] OR "anemias"[All Fields]) OR ("epilepsy"[MeSH Terms] OR "epilepsy"[All Fields]) OR ("epilepsy"[MeSH Terms] OR "epilepsy"[All Fields] OR "epileptic"[All Fields]) OR ("seizures"[MeSH Terms] OR "seizures"[All Fields] OR "seizure"[All Fields] OR ("seizures"[MeSH Terms] OR "seizures"[All Fields] OR ("stroke"[MeSH Terms] OR "stroke"[All Fields] OR ("stroke"[MeSH Terms] OR "stroke"[All Fields] OR "strokes"[All Fields]) OR ("multiple sclerosis"[MeSH Terms] OR ("multiple"[All Fields] AND "sclerosis"[All Fields]) OR "multiple sclerosis"[All Fields]) OR (autoimmune[All Fields] AND ("brain diseases"[MeSH Terms] OR ("brain"[All Fields] AND "diseases"[All Fields]) OR "brain diseases"[All Fields] OR "encephalopathy"[All Fields])) OR (paraneoplastic[All Fields] AND ("encephalitis"[MeSH Terms] OR "encephalitis"[All Fields])) OR ("peripheral nervous system diseases"[MeSH Terms] OR ("peripheral"[All Fields] AND "nervous"[All Fields] AND "system"[All Fields] AND "diseases"[All Fields]) OR "peripheral nervous system diseases"[All Fields] OR ("peripheral"[All Fields] AND "neuropathy"[All Fields]) OR "peripheral neuropathy"[All Fields]) OR ("dementia"[MeSH Terms] OR "dementia"[All Fields]) OR ("parkinson disease"[MeSH Terms] OR "parkinson"[All Fields] AND "disease"[All Fields]) OR "parkinson disease"[All Fields] OR ("parkinson disease"[MeSH Terms] OR "parkinson"[All Fields] AND "disease"[All Fields]) OR "parkinson disease"[All Fields] OR ("parkinson's"[All Fields] AND "disease"[All Fields]) OR "parkinson's disease"[All Fields] OR ("vitiligo"[MeSH Terms] OR "vitiligo"[All Fields]) OR ("acne vulgaris"[MeSH Terms] OR "acne"[All Fields] AND "vulgaris"[All Fields]) OR "acne vulgaris"[All Fields] OR "acne"[All Fields] OR ("melanoma"[MeSH Terms] OR "melanoma"[All Fields]) OR (systemic[All Fields] AND ("lupus vulgaris"[MeSH Terms] OR "lupus"[All Fields] AND "vulgaris"[All Fields]) OR "lupus vulgaris"[All Fields] OR "lupus"[All Fields] OR "lupus erythematosus, systemic"[MeSH Terms] OR ("lupus"[All Fields] AND "erythematosus"[All Fields] AND "systemic"[All Fields]) OR "systemic lupus erythematosus"[All Fields]) OR ("dermatitis, atopic"[MeSH Terms] OR "dermatitis"[All Fields] AND "atopic"[All Fields]) OR "atopic dermatitis"[All Fields] OR ("atopic"[All Fields] AND "eczema"[All Fields]) OR "atopic eczema"[All Fields] OR ("coeliac disease"[All Fields] OR "celiac disease"[MeSH Terms] OR ("celiac"[All Fields] AND "disease"[All Fields]) OR "celiac disease"[All Fields]) OR ("spondylitis, ankylosing"[MeSH Terms] OR "spondylitis"[All Fields] AND "ankylosing"[All Fields]) OR "ankylosing spondylitis"[All Fields] OR ("ankylosing"[All Fields] AND "spondylitis"[All Fields]) OR ("psoriasis"[MeSH Terms] OR "psoriasis"[All Fields]) OR ("arthritis, rheumatoid"[MeSH Terms] OR "arthritis"[All Fields] AND "rheumatoid"[All Fields]) OR "rheumatoid arthritis"[All Fields] OR ("rheumatoid"[All Fields] AND "arthritis"[All Fields])) OR ("inflammatory bowel diseases"[MeSH Terms] OR ("inflammatory"[All Fields] AND "bowel"[All Fields] AND "diseases"[All Fields]) OR "inflammatory bowel diseases"[All Fields] OR ("inflammatory"[All Fields] AND "bowel"[All Fields] AND "disease"[All Fields]) OR "inflammatory bowel disease"[All Fields]) OR (Graves's[All Fields] AND ("disease"[MeSH Terms] OR "disease"[All Fields])) OR ("graves disease"[MeSH Terms] OR "graves"[All Fields] AND "disease"[All Fields]) OR "graves disease"[All Fields]) OR ("neoplasms"[MeSH Terms] OR "neoplasms"[All Fields] OR "neoplasm"[All Fields]) OR ("neoplasms"[MeSH Terms] OR "neoplasms"[All Fields]) OR ("neoplasms"[MeSH Terms] OR "neoplasms"[All Fields] OR "cancer"[All Fields]) OR ("neoplasms"[MeSH Terms] OR "neoplasms"[All Fields] OR "cancers"[All Fields]) OR ("tumour"[All Fields] OR "neoplasms"[MeSH Terms] OR "neoplasms"[All Fields] OR "tumor"[All Fields]) OR ("tumours"[All Fields] OR "neoplasms"[MeSH Terms] OR "neoplasms"[All Fields] OR "tumors"[All Fields]) OR (Cushing [All Fields] OR Cushing [MeSH Terms]) OR



("hidradenitis suppurativa"[All Fields] OR "hidradenitis suppurativa" [MeSH Terms]) OR ("metabolic syndrome" [All Fields] OR "metabolic syndrome" [MeSH Terms]) OR ("chronic renal failure" [All Fields] OR "chronic renal failure" [MeSH Terms]) OR ("myeloproliferative disorder\*" [All Fields] OR "myeloproliferative disorder\*" [MeSH Terms]) OR (Alzheimer [All Fields] OR Alzheimer [MeSH Terms]) OR ("neurocognitive disorder\*" [All Fields] OR "neurocognitive disorder\*" [MeSH Terms]) OR ("Lewy Bodies" [All Fields] OR "Lewy Bodies" [MeSH Terms]) OR (Huntington [All Fields] OR Huntington [MeSH Terms]) OR ("myocardial infarction" [All Fields] OR "myocardial infarction" [MeSH Terms]) OR (sarcoidosis [All Fields] OR sarcoidosis [MeSH Terms]) AND ("attention deficit disorder with hyperactivity" [MeSH Terms] OR ("attention" [All Fields] AND "deficit" [All Fields] AND "disorder" [All Fields] AND "hyperactivity" [All Fields]) OR "attention deficit disorder with hyperactivity" [All Fields] OR "adhd" [All Fields]) OR ("attention deficit disorder with hyperactivity" [MeSH Terms] OR ("attention" [All Fields] AND "deficit" [All Fields] AND "disorder" [All Fields] AND "hyperactivity" [All Fields]) OR "attention deficit disorder with hyperactivity" [All Fields] OR ("attention" [All Fields] AND "deficit" [All Fields] AND "hyperactivity" [All Fields] AND "disorder" [All Fields]) OR "attention deficit hyperactivity disorder" [All Fields]) OR ("attention deficit disorder with hyperactivity" [MeSH Terms] OR ("attention" [All Fields] AND "deficit" [All Fields] AND "disorder" [All Fields] AND "hyperactivity" [All Fields]) OR "attention deficit disorder with hyperactivity" [All Fields] OR ("attention" [All Fields] AND "deficit" [All Fields]) OR "attention deficit" [All Fields]) OR ("attention deficit disorder with hyperactivity" [MeSH Terms] OR ("attention" [All Fields] AND "deficit" [All Fields] AND "disorder" [All Fields] AND "hyperactivity" [All Fields]) OR "attention deficit disorder with hyperactivity" [All Fields] OR ("hyperkinetic" [All Fields] AND "disorder" [All Fields]) OR "hyperkinetic disorder" [All Fields]) OR ("attention deficit disorder with hyperactivity" [MeSH Terms] OR ("attention" [All Fields] AND "deficit" [All Fields] AND "disorder" [All Fields] AND "hyperactivity" [All Fields]) OR "attention deficit disorder with hyperactivity" [All Fields] OR ("hyperkinetic" [All Fields] AND "syndrome" [All Fields]) OR "hyperkinetic syndrome" [All Fields]) OR ("autistic disorder" [MeSH Terms] OR ("autistic" [All Fields] AND "disorder" [All Fields]) OR "autistic disorder" [All Fields] OR "autism" [All Fields]) OR ("autistic disorder" [MeSH Terms] OR ("autistic" [All Fields] AND "disorder" [All Fields]) OR "autistic disorder" [All Fields] OR "autistic" [All Fields]) OR Asperger [All Fields] OR ("schizophrenia" [MeSH Terms] OR "schizophrenia" [All Fields]) OR schizophrenic [All Fields] OR ("psychotic disorders" [MeSH Terms] OR ("psychotic" [All Fields] AND "disorders" [All Fields]) OR "psychotic disorders" [All Fields] OR ("psychotic" [All Fields] AND "disorder" [All Fields]) OR "psychotic disorder" [All Fields]) OR ("psychotic disorders" [MeSH Terms] OR ("psychotic" [All Fields] AND "disorders" [All Fields]) OR "psychotic disorders" [All Fields]) OR ("psychotic disorders" [MeSH Terms] OR ("psychotic" [All Fields] AND "disorders" [All Fields]) OR "psychotic disorders" [All Fields] OR "psychosis" [All Fields]) OR ("bipolar disorder" [MeSH Terms] OR ("bipolar" [All Fields] AND "disorder" [All Fields]) OR "bipolar disorder" [All Fields]) OR ("bipolar" [All Fields] AND "disorder" [All Fields]) OR "bipolar disorder" [MeSH Terms] OR ("bipolar" [All Fields] AND "disorders" [All Fields]) OR "bipolar disorders" [All Fields]) OR ("depressive disorder" [MeSH Terms] OR ("depressive" [All Fields] AND "disorder" [All Fields]) OR "depressive disorder" [All Fields] OR "depression" [All Fields] OR "depression" [MeSH Terms]) OR depressive [All Fields] OR ("affect" [MeSH Terms] OR "affect" [All Fields] OR "mood" [All Fields]) OR ("anxiety" [MeSH Terms] OR "anxiety" [All Fields]) OR ("anxiety" [MeSH Terms] OR "anxiety" [All Fields] OR "anxious" [All Fields]) OR ("obsessive-compulsive disorder" [MeSH Terms] OR ("obsessive-compulsive" [All Fields] AND "disorder" [All Fields]) OR "obsessive-

compulsive disorder"[All Fields] OR ("obsessive"[All Fields] AND "compulsive"[All Fields] AND "disorder"[All Fields]) OR "obsessive compulsive disorder"[All Fields]) OR ("obsessive-compulsive disorder"[MeSH Terms] OR ("obsessive-compulsive"[All Fields] AND "disorder"[All Fields]) OR "obsessive-compulsive disorder"[All Fields] OR ("obsessive"[All Fields] AND "compulsive"[All Fields] AND "disorder"[All Fields]) OR "obsessive compulsive disorder"[All Fields]) OR OCD[All Fields] OR ("stress disorders, post-traumatic"[MeSH Terms] OR ("stress"[All Fields] AND "disorders"[All Fields] AND "post-traumatic"[All Fields]) OR "post-traumatic stress disorders"[All Fields] OR "ptsd"[All Fields]) OR (Trauma-related[All Fields] AND ("disease"[MeSH Terms] OR "disease"[All Fields] OR "disorder"[All Fields])) OR (Trauma-related[All Fields] AND ("disease"[MeSH Terms] OR "disease"[All Fields] OR "disorders"[All Fields])) OR (Stress-related[All Fields] AND ("disease"[MeSH Terms] OR "disease"[All Fields] OR "disorder"[All Fields])) OR (Stress-related[All Fields] AND ("disease"[MeSH Terms] OR "disease"[All Fields] OR "disorders"[All Fields])) OR ("substance-related disorders"[MeSH Terms] OR ("substance-related"[All Fields] AND "disorders"[All Fields]) OR "substance-related disorders"[All Fields] OR ("substance"[All Fields] AND "related"[All Fields] AND "disorder"[All Fields]) OR "substance related disorder"[All Fields]) OR ("substance-related disorders"[MeSH Terms] OR ("substance-related"[All Fields] AND "disorders"[All Fields]) OR "substance-related disorders"[All Fields] OR ("substance"[All Fields] AND "related"[All Fields] AND "disorders"[All Fields]) OR "substance related disorders"[All Fields]) OR (addictive[All Fields] AND ("disease"[MeSH Terms] OR "disease"[All Fields] OR "disorder"[All Fields])) OR ("substance-related disorders"[MeSH Terms] OR ("substance-related"[All Fields] AND "disorders"[All Fields]) OR "substance-related disorders"[All Fields] OR ("substance"[All Fields] AND "disorder"[All Fields]) OR "substance use disorder"[All Fields]) OR ("substance-related disorders"[MeSH Terms] OR ("substance-related"[All Fields] AND "disorders"[All Fields]) OR "substance-related disorders"[All Fields] OR ("substance"[All Fields] AND "disorders"[All Fields]) OR "substance use disorders"[All Fields]) OR ("substance-related disorders"[MeSH Terms] OR ("substance-related"[All Fields] AND "disorders"[All Fields]) OR "substance-related disorders"[All Fields] OR ("substance"[All Fields] AND "abuse"[All Fields] AND "disorder"[All Fields]) OR "substance abuse disorder"[All Fields]) OR ("substance-related disorders"[MeSH Terms] OR ("substance-related"[All Fields] AND "disorders"[All Fields]) OR "substance-related disorders"[All Fields] OR ("substance"[All Fields] AND "abuse"[All Fields]) OR "substance abuse"[All Fields]) AND ("disease"[MeSH Terms] OR "disease"[All Fields] OR "disorders"[All Fields])) OR ("Dipend Patologiche"[Journal] OR ("addiction"[All Fields] AND "disorders"[All Fields]) OR "addiction disorders"[All Fields]) OR ("substance-related disorders"[MeSH Terms] OR ("substance-related"[All Fields] AND "disorders"[All Fields]) OR "substance-related disorders"[All Fields] OR ("drug"[All Fields] AND "abuse"[All Fields]) OR "drug abuse"[All Fields]) OR ("feeding and eating disorders"[MeSH Terms] OR ("feeding"[All Fields] AND "eating"[All Fields] AND "disorders"[All Fields]) OR "feeding and eating disorders"[All Fields] OR ("eating"[All Fields] AND "disorder"[All Fields]) OR "eating disorder"[All Fields]) OR ("feeding and eating disorders"[MeSH Terms] OR ("feeding"[All Fields] AND "eating"[All Fields] AND "disorders"[All Fields]) OR "feeding and eating disorders"[All Fields] OR ("eating"[All Fields] AND "disorders"[All Fields]) OR "eating disorders"[All Fields]) OR ("anorexia"[MeSH Terms] OR "anorexia"[All Fields]) OR ("bulimia"[MeSH Terms] OR "bulimia"[All Fields]) OR ("bulimia"[MeSH Terms] OR "bulimia"[All Fields] OR ("binge"[All Fields] AND "eating"[All Fields]) OR "binge eating"[All Fields]) OR ("bulimia"[MeSH Terms] OR "bulimia"[All Fields] OR ("binge"[All Fields] AND "eating"[All Fields]) OR "binge eating"[All Fields]) OR ("sleep wake disorders"[MeSH Terms] OR ("sleep"[All Fields] AND "wake"[All Fields] AND

"disorders"[All Fields] OR "sleep wake disorders"[All Fields] OR ("sleep"[All Fields] AND "disorder"[All Fields]) OR "sleep disorder"[All Fields] OR ("sleep wake disorders"[MeSH Terms] OR ("sleep"[All Fields] AND "wake"[All Fields] AND "disorders"[All Fields]) OR "sleep wake disorders"[All Fields] OR ("sleep"[All Fields] AND "disorders"[All Fields]) OR "sleep disorders"[All Fields]) OR ("sleep wake disorders"[MeSH Terms] OR ("sleep"[All Fields] AND "wake"[All Fields] AND "disorders"[All Fields]) OR "sleep wake disorders"[All Fields] OR ("sleep"[All Fields] AND "disturbance"[All Fields]) OR "sleep disturbance"[All Fields]) OR ("sleep wake disorders"[MeSH Terms] OR ("sleep"[All Fields] AND "wake"[All Fields] AND "disorders"[All Fields]) OR "sleep wake disorders"[All Fields] OR ("sleep"[All Fields] AND "disturbances"[All Fields]) OR "sleep disturbances"[All Fields]) OR ("sleep initiation and maintenance disorders"[MeSH Terms] OR ("sleep"[All Fields] AND "initiation"[All Fields] AND "maintenance"[All Fields] AND "disorders"[All Fields]) OR "sleep initiation and maintenance disorders"[All Fields] OR "insomnia"[All Fields]) OR ("personality disorders"[MeSH Terms] OR ("personality"[All Fields] AND "disorders"[All Fields]) OR "personality disorders"[All Fields] OR ("personality"[All Fields] AND "disorder"[All Fields]) OR "personality disorder"[All Fields]) OR ("personality disorders"[MeSH Terms] OR ("personality"[All Fields] AND "disorders"[All Fields]) OR "personality disorders"[All Fields]) OR ("mental disorders"[MeSH Terms] OR ("mental"[All Fields] AND "disorders"[All Fields]) OR "mental disorders"[All Fields] OR ("mental"[All Fields] AND "disorder"[All Fields]) OR "mental disorder"[All Fields]) OR ("mental disorders"[MeSH Terms] OR ("mental"[All Fields] AND "disorders"[All Fields]) OR "mental disorders"[All Fields]) OR ("mental disorders"[MeSH Terms] OR ("mental"[All Fields] AND "disorders"[All Fields]) OR "mental disorders"[All Fields] OR ("psychiatric"[All Fields] AND "disorder"[All Fields]) OR "psychiatric disorder"[All Fields]) OR ("mental disorders"[MeSH Terms] OR ("mental"[All Fields] AND "disorders"[All Fields]) OR "mental disorders"[All Fields] OR ("psychiatric"[All Fields] AND "disorders"[All Fields]) OR "psychiatric disorders"[All Fields]) OR (psychopathological[All Fields] AND ("disease"[MeSH Terms] OR "disease"[All Fields] OR "disorder"[All Fields])) OR (psychopathological [All Fields] AND ("disease"[MeSH Terms] OR "disease"[All Fields] OR "disorders"[All Fields])) OR (psychopathological[All Fields] AND ("disease"[MeSH Terms] OR "disease"[All Fields] OR "condition"[All Fields])) OR (psychopathological[All Fields] AND conditions[All Fields]) OR ("neurodevelopmental disorder\*"[All Fields] OR "neurodevelopmental disorder\*"[MeSH Terms]) OR ("Intellectual Disabilit\*"[All Fields] OR "Intellectual Disabilit\*"[MeSH Terms]) OR ("mental retardation" [All Fields] OR "mental retardation" [MeSH Terms]) OR ("learning disability" [All Fields] OR "learning disability" [MeSH Terms]) OR (Schizotypal [All Fields] OR Schizotypal [MeSH Terms]) OR ("Delusional Disorder" [All Fields] OR "Delusional Disorder" [MeSH Terms]) OR ("Brief Psychotic Disorder" [All Fields] OR "Brief Psychotic Disorder" [MeSH Terms]) OR ("Schizophreniform Disorder" [All Fields] OR "Schizophreniform Disorder" [MeSH Terms]) OR ("Schizoaffective disorder" [All Fields] OR "Schizoaffective disorder" [MeSH Terms]) OR ("panic disorder" [All Fields] OR "panic disorder" [MeSH Terms]) OR (agoraphobia [All Fields] OR agoraphobia [MeSH Terms]) OR ("Body Dysmorphic Disorder" [All Fields] OR "Body Dysmorphic Disorder" [MeSH Terms]) OR (Trichotillomania [All Fields] OR Trichotillomania [MeSH Terms]) OR ("Hair-Pulling Disorder" [All Fields] OR "Hair-Pulling Disorder" [MeSH Terms]) OR ("Excoriation Disorder" [All Fields] OR "Excoriation Disorder" [MeSH Terms]) OR ("Skin-Picking disorder" [All Fields] OR "Skin-Picking disorder" [MeSH Terms]) OR ("dissociative disorder\*"[All Fields] OR "dissociative disorder\*"[MeSH Terms]) OR ("Dissociative Identity Disorder" [All Fields] OR "Dissociative Identity Disorder" [MeSH Terms]) OR ("Restless Legs Syndrome" [All Fields] OR "Restless Legs Syndrome" [MeSH Terms]) OR

(“Gender Dysphoria” [All Fields] OR “Gender Dysphoria” [MeSH Terms]) OR (“Antisocial Personality Disorder” [All Fields] OR “Antisocial Personality Disorder” [MeSH Terms]) OR (“Paranoid Personality Disorder” [All Fields] OR “Paranoid Personality Disorder” [MeSH Terms]) OR (“Schizoid Personality Disorder” [All Fields] OR “Schizoid Personality Disorder” [MeSH Terms]) OR (“Schizotypal Personality Disorder” [All Fields] OR “Schizotypal Personality Disorder” [MeSH Terms]) OR (“Borderline Personality Disorder” [All Fields] OR “Borderline Personality Disorder” [MeSH Terms]) OR (“Histrionic Personality Disorder” [All Fields] OR “Histrionic Personality Disorder” [MeSH Terms]) OR (“Narcissistic Personality Disorder” [All Fields] OR “Narcissistic Personality Disorder” [MeSH Terms]) OR (“Avoidant Personality Disorder” [All Fields] OR “Avoidant Personality Disorder” [MeSH Terms]) OR (“Dependent Personality Disorder” [All Fields] OR “Dependent Personality Disorder” [MeSH Terms]) OR (“Obsessive-Compulsive Personality Disorder” [All Fields] OR “Obsessive-Compulsive Personality Disorder” [MeSH Terms]) OR (paraphili\* [All Fields] OR paraphili\*[MeSH Terms]) OR (“Voyeuristic Disorder” [All Fields] OR “Voyeuristic Disorder” [MeSH Terms]) OR (“Exhibitionistic Disorder” [All Fields] OR “Exhibitionistic Disorder” [MeSH Terms]) OR (“Frotteuristic Disorder” [All Fields] OR “Frotteuristic Disorder” [MeSH Terms]) OR (“Sexual Masochism Disorder” [All Fields] OR “Sexual Masochism Disorder” [MeSH Terms]) OR (“Sexual Sadism Disorder” [All Fields] OR “Sexual Sadism Disorder” [MeSH Terms]) OR (“Pedophilic Disorder” [All Fields] OR “Pedophilic Disorder” [MeSH Terms]) OR (“Fetishistic Disorder” [All Fields] OR “Fetishistic Disorder” [MeSH Terms]) OR (“Transvestic Disorder” [All Fields] OR “Transvestic Disorder” [MeSH Terms])) AND (“systematic review”[Publication Type] OR "systematic reviews as topic"[MeSH Terms] OR "systematic review"[All Fields]) OR ("systematic review"[Publication Type] OR "systematic reviews as topic"[MeSH Terms] OR "systematic reviews"[All Fields]) OR ("meta-analysis"[Publication Type] OR "meta-analysis as topic"[MeSH Terms] OR "meta-analysis"[All Fields]) OR meta-analytic[All Fields] OR ("meta-analysis as topic"[MeSH Terms] OR "meta-analysis"[All Fields] AND "topic"[All Fields]) OR "meta-analysis as topic"[All Fields] OR "metaanalysis"[All Fields]) OR ("meta-analysis"[Publication Type] OR "meta-analysis as topic"[MeSH Terms] OR "meta-analysis"[All Fields]) OR metanalytic[All Fields] OR metaanalyses[All Fields] OR ("meta-analysis"[Publication Type] OR "meta-analysis as topic"[MeSH Terms] OR "meta-analyses"[All Fields]) OR ("meta-analysis"[Publication Type] OR "meta-analysis as topic"[MeSH Terms] OR "meta-analyses"[All Fields]) OR metaanalyses[All Fields] OR meta-review[All Fields] OR meta-reviews[All Fields] OR (umbrella[All Fields] AND ("review"[Publication Type] OR "review literature as topic"[MeSH Terms] OR "review"[All Fields])) OR (umbrella[All Fields] AND ("review"[Publication Type] OR "review literature as topic"[MeSH Terms] OR "reviews"[All Fields]))

**Limits: none**

### **OVID databases (PsycInfo, EMBASE+EMBASE classic, OVID Medline)**

(Obesity OR obese OR overweight OR over weight OR dyslipidemia OR diabetes OR diabetic OR thyroid disorder OR thyroid disorders OR coronary heart disease OR coronary heart diseases OR sudden cardiac death OR cerebrovascular disease OR cerebrovascular diseases OR cerebro vascular disease OR cerebro vascular diseases OR cerebral vascular disease OR cerebral vascular diseases OR hypertension OR hypertensive OR myocarditis OR



angina OR transient ischemic attack OR transient ischemic attacks OR transient ischaemic attack OR transient ischaemic attacks OR heart failure OR peripheral artery disease OR peripheral artery diseases OR hypertrophic cardiomyopathy OR pneumonia OR asthma OR asthmatic OR chronic obstructive pulmonary disease OR chronic obstructive pulmonary diseases OR COPD OR obstructive sleep apnea syndrome OR influenza OR liver disease OR liver diseases OR functional gastrointestinal disorder OR functional gastrointestinal disorders OR ulcerative colitis OR Crohn disease OR gastroesophageal reflux disease OR gastroesophageal reflux diseases OR GERD OR chronic pancreatitis OR kidney disease OR kidney diseases OR acute kidney injury OR acute kidney injuries OR dialysis OR benign prostatic hyperplasia OR kidney stone OR kidney stones OR osteoporosis OR fracture OR fractures OR lymphoma OR anemia OR anemias OR anaemia OR anaemias OR epilepsy OR epileptic OR seizure OR seizures OR stroke OR strokes OR multiple sclerosis OR autoimmune encephalopathy OR paraneoplastic encephalitis OR peripheral neuropathy OR dementia OR Parkinson disease OR vitiligo OR acne OR melanoma OR systemic lupus OR atopic eczema OR celiac disease OR ankylosing spondylitis OR psoriasis OR rheumatoid arthritis OR inflammatory bowel disease OR Graves disease OR Neoplasm OR Neoplasms OR cancer OR cancers OR tumor OR tumors OR Cushing OR hidradenitis suppurativa OR metabolic syndrome OR chronic renal failure OR myeloproliferative disorder OR myeloproliferative disorders OR Alzheimer OR neurocognitive disorder OR neurocognitive disorders OR Lewy Bodies OR Huntington OR myocardial infarction OR sarcoidosis) AND (ADHD OR attention-deficit hyperactivity disorder OR attention deficit OR hyperkinetic disorder OR hyperkinetic syndrome OR Autism OR autistic OR Asperger OR Schizophrenia OR schizophrenic OR psychotic disorder OR psychotic disorders OR psychosis OR Bipolar disorder OR bipolar disorders OR Depression OR depressive OR mood OR Anxiety OR anxious OR Obsessive-compulsive disorder OR Obsessive compulsive disorder OR OCD OR PTSD OR Trauma-related disorder OR Trauma-related disorders OR Stress-related disorder OR Stress-related disorders OR Substance-related disorder OR Substance-related disorders OR addictive disorder OR addiction disorders OR drug abuse OR eating disorder OR eating disorders OR anorexia OR bulimia OR binge-eating OR binge eating OR sleep disorder OR sleep disorders OR sleep disturbance OR sleep disturbances OR insomnia OR Personality disorder OR Personality disorders OR mental disorder OR mental disorders OR psychiatric disorder OR psychiatric disorders OR psychopathological disorder OR psychopathological disorders OR psychopathological condition OR psychopathological conditions OR neurodevelopmental disorder OR neurodevelopmental disorders OR Intellectual Disability OR Intellectual Disabilities OR mental retardation OR learning disability OR Schizotypal OR Delusional Disorder OR Brief Psychotic Disorder OR Schizophreniform Disorder OR Schizoaffective disorder OR panic disorder OR agoraphobia OR Body Dysmorphic Disorder OR Trichotillomania OR Hair-Pulling Disorder OR Excoriation Disorder OR Skin-Picking Disorder OR dissociative disorder OR dissociative disorders Dissociative Identity Disorder OR Restless Legs Syndrome OR Gender Dysphoria OR Antisocial Personality Disorder OR Paranoid Personality Disorder OR Schizoid Personality Disorder OR Schizotypal Personality Disorder OR Borderline Personality Disorder OR Histrionic Personality Disorder OR Narcissistic Personality Disorder OR Avoidant Personality Disorder OR Dependent Personality Disorder OR Obsessive-Compulsive Personality Disorder OR paraphilia OR paraphilic OR Voyeuristic Disorder OR Frotteuristic Disorder OR Sexual Masochism Disorder OR Sexual Sadism Disorder OR Pedophilic Disorder OR Fetishistic Disorder OR Transvestic Disorder) AND (systematic review OR systematic reviews OR meta-analysis OR meta-analytic OR metaanalysis OR meta analysis OR metanalytic OR metanalyses OR meta-analyses OR meta analyses OR metaanalyses OR meta-review OR meta-reviews OR umbrella review OR umbrella reviews)

Limits: none

**WEB OF SCIENCE databases (Web of Science Core Collection, Biological Abstracts, BIOSIS Citation Index, Current Contents Connect, Data Citation Index, Derwent, Innovations Index, FSTA® - the food science resource, KCI-Korean Journal Database MEDLINE®, Russian Science Citation Index, SciELO Citation Index, Zoological Record)**

Search terms:

Obesity OR obese OR overweight OR over weight OR dyslipidemia OR diabetes OR diabetic OR thyroid disorder OR thyroid disorders OR coronary heart disease OR coronary heart diseases OR sudden cardiac death OR cerebrovascular disease OR cerebrovascular diseases OR cerebro vascular disease OR cerebro vascular diseases OR cerebral vascular disease OR cerebral vascular diseases OR hypertension OR hypertensive OR myocarditis OR angina OR transient ischemic attack OR transient ischemic attacks OR transient ischaemic attack OR transient ischaemic attacks OR heart failure OR peripheral artery disease OR peripheral artery diseases OR hypertrophic cardiomyopathy OR pneumonia OR asthma OR asthmatic OR chronic obstructive pulmonary disease OR chronic obstructive pulmonary diseases OR COPD OR obstructive sleep apnea syndrome OR influenza OR liver disease OR liver diseases OR functional gastrointestinal disorder OR functional gastrointestinal disorders OR ulcerative colitis OR Crohn's disease OR Crohn disease OR gastroesophageal reflux disease OR gastroesophageal reflux diseases OR GERD OR chronic pancreatitis OR kidney disease OR kidney diseases OR acute kidney injury OR acute kidney injuries OR dialysis OR benign prostatic hyperplasia OR kidney stone OR kidney stones OR osteoporosis OR fracture OR fractures OR lymphoma OR anemia OR anemias OR anaemia OR anaemias OR epilepsy OR epileptic OR seizure OR seizures OR stroke OR strokes OR multiple sclerosis OR autoimmune encephalopathy OR paraneoplastic encephalitis OR peripheral neuropathy OR dementia OR Parkinson disease OR Parkinson's disease OR vitiligo OR acne OR melanoma OR systemic lupus OR atopic eczema OR celiac disease OR ankylosing spondylitis OR psoriasis OR rheumatoid arthritis OR inflammatory bowel disease OR Graves's disease OR Graves disease OR Neoplasm OR Neoplasms OR cancer OR cancers OR tumor OR tumors OR Cushing OR hidradenitis suppurativa OR metabolic syndrome OR chronic renal failure OR myeloproliferative disorder OR myeloproliferative disorders OR Alzheimer OR neurocognitive disorder OR neurocognitive disorders OR Lewy Bodies OR Huntington OR myocardial infarction OR sarcoidosis

ADHD OR attention-deficit hyperactivity disorder OR attention deficit OR hyperkinetic disorder OR hyperkinetic syndrome OR Autism OR autistic OR Asperger OR Schizophrenia OR schizophrenic OR psychotic disorder OR psychotic disorders OR psychosis OR Bipolar disorder OR bipolar disorders OR Depression OR depressive OR mood OR Anxiety OR anxious OR Obsessive-compulsive disorder OR Obsessive compulsive disorder OR OCD OR PTSD OR Trauma-related disorder OR Trauma-related disorders OR Stress-related disorder OR Stress-related disorders OR Substance-related disorder OR Substance-related disorders OR addictive disorder OR addiction disorders OR drug abuse OR eating disorder OR eating

disorders OR anorexia OR bulimia OR binge-eating OR binge eating OR sleep disorder OR sleep disorders OR sleep disturbance OR sleep disturbances OR insomnia OR Personality disorder OR Personality disorders OR mental disorder OR mental disorders OR psychiatric disorder OR psychiatric disorders OR psychopathological disorder OR psychopathological disorders OR psychopathological condition OR psychopathological conditions OR neurodevelopmental disorder OR neurodevelopmental disorders OR Intellectual Disability OR Intellectual Disabilities OR mental retardation OR learning disability OR Schizotypal OR Delusional Disorder OR Brief Psychotic Disorder OR Schizophreniform Disorder OR Schizoaffective disorder OR panic disorder OR agoraphobia OR Body Dysmorphic Disorder OR Trichotillomania OR Hair-Pulling Disorder OR Excoriation Disorder OR Skin-Picking Disorder OR dissociative disorder OR dissociative disorders Dissociative Identity Disorder OR Restless Legs Syndrome OR Gender Dysphoria OR Antisocial Personality Disorder OR Paranoid Personality Disorder OR Schizoid Personality Disorder OR Schizotypal Personality Disorder OR Borderline Personality Disorder OR Histrionic Personality Disorder OR Narcissistic Personality Disorder OR Avoidant Personality Disorder OR Dependent Personality Disorder OR Obsessive-Compulsive Personality Disorder OR paraphilia OR paraphilic OR Voyeuristic Disorder OR Frotteuristic Disorder OR Sexual Masochism Disorder OR Sexual Sadism Disorder OR Pedophilic Disorder OR Fetishistic Disorder OR Transvestic Disorder

systematic review OR systematic reviews OR meta-analysis OR meta-analytic OR metaanalysis OR meta analysis OR metanalytic OR metanalyses OR meta-analyses OR meta analyses OR metaanalyses OR meta-review OR meta-reviews OR umbrella review OR umbrella reviews

Limits: none

**Search strategy, search terms/syntax for AMASU-PED.****Pubmed**

(  
 ("obesity"[MeSH Terms] OR "obesity"[All Fields])  
 OR ("obesity"[MeSH Terms] OR "obesity"[All Fields] OR "obese"[All Fields])  
 OR ("overweight"[MeSH Terms] OR "overweight"[All Fields])  
 OR ("overweight"[MeSH Terms] OR "overweight"[All Fields] OR ("over"[All Fields] AND "weight"[All Fields]) OR "over weight"[All Fields])  
 OR ("dyslipidemias"[MeSH Terms] OR "dyslipidemias"[All Fields] OR "dyslipidemia"[All Fields])  
 OR ("diabetes mellitus"[MeSH Terms] OR ("diabetes"[All Fields] AND "mellitus"[All Fields]) OR "diabetes mellitus"[All Fields])  
 OR ("diabetes"[All Fields])  
 OR ("diabetes insipidus"[MeSH Terms] OR ("diabetes"[All Fields] AND "insipidus"[All Fields]) OR "diabetes insipidus"[All Fields])  
 OR (diabetic[All Fields])  
  
 OR ("thyroid diseases"[MeSH Terms] OR ("thyroid"[All Fields] AND "diseases"[All Fields]) OR "thyroid diseases"[All Fields] OR ("thyroid"[All Fields] AND "disorder"[All Fields]) OR "thyroid disorder"[All Fields]) OR ("thyroid diseases"[MeSH Terms] OR ("thyroid"[All Fields] AND "diseases"[All Fields]) OR "thyroid diseases"[All Fields] OR ("thyroid"[All Fields] AND "disorders"[All Fields]) OR "thyroid disorders"[All Fields])  
  
 OR ("coronary disease"[MeSH Terms] OR ("coronary"[All Fields] AND "disease"[All Fields]) OR "coronary disease"[All Fields] OR ("coronary"[All Fields] AND "heart"[All Fields] AND "disease"[All Fields]) OR "coronary heart disease"[All Fields]) OR ("coronary disease"[MeSH Terms] OR ("coronary"[All Fields] AND "disease"[All Fields]) OR "coronary disease"[All Fields] OR ("coronary"[All Fields] AND "heart"[All Fields] AND "diseases"[All Fields]) OR "coronary heart diseases"[All Fields]) OR ("death, sudden, cardiac"[MeSH Terms] OR ("death"[All Fields] AND "sudden"[All Fields] AND "cardiac"[All Fields]) OR "cardiac sudden death"[All Fields] OR ("sudden"[All Fields] AND "cardiac"[All Fields] AND "death"[All Fields]) OR "sudden cardiac death"[All Fields]) OR ("cerebrovascular disorders"[MeSH Terms] OR ("cerebrovascular"[All Fields] AND "disorders"[All Fields]) OR "cerebrovascular disorders"[All Fields]) OR ("cerebrovascular"[All Fields] AND "disease"[All Fields]) OR "cerebrovascular disease"[All Fields]) OR ("cerebrovascular disorders"[MeSH Terms] OR ("cerebrovascular"[All Fields] AND "disorders"[All Fields]) OR "cerebrovascular disorders"[All Fields] OR ("cerebrovascular"[All Fields] AND "diseases"[All Fields]) OR "cerebrovascular diseases"[All Fields]) OR (cerebro[All Fields] AND ("vascular diseases"[MeSH Terms] OR ("vascular"[All Fields] AND "diseases"[All Fields]) OR "vascular diseases"[All Fields] OR ("vascular"[All Fields] AND "disease"[All Fields]) OR "vascular disease"[All Fields])) OR (cerebro[All Fields] AND ("vascular diseases"[MeSH Terms] OR ("vascular"[All Fields] AND "diseases"[All Fields]) OR "vascular diseases"[All Fields])) OR (("cerebrum"[MeSH Terms] OR "cerebrum"[All Fields] OR "cerebral"[All Fields] OR "brain"[MeSH Terms] OR "brain"[All Fields]) AND ("vascular diseases"[MeSH Terms] OR ("vascular"[All Fields] AND "diseases"[All Fields]) OR "vascular diseases"[All Fields] OR ("vascular"[All Fields] AND "disease"[All Fields]) OR "vascular disease"[All Fields])) OR (("cerebrum"[MeSH Terms] OR "cerebrum"[All Fields] OR "cerebral"[All Fields] OR "brain"[MeSH Terms] OR



"brain"[All Fields]) AND ("vascular diseases"[MeSH Terms] OR ("vascular"[All Fields] AND "diseases"[All Fields]) OR "vascular diseases"[All Fields])) OR ("hypertension"[MeSH Terms] OR "hypertension"[All Fields]) OR hypertensive[All Fields] OR ("myocarditis"[MeSH Terms] OR "myocarditis"[All Fields]) OR ("angina pectoris"[MeSH Terms] OR ("angina"[All Fields] AND "pectoris"[All Fields]) OR "angina pectoris"[All Fields] OR "angina"[All Fields]) OR ("transient ischaemic attack"[All Fields] OR "ischemic attack, transient"[MeSH Terms] OR ("ischemic"[All Fields] AND "attack"[All Fields] AND "transient"[All Fields]) OR "transient ischemic attack"[All Fields] OR ("transient"[All Fields] AND "ischemic"[All Fields] AND "attack"[All Fields])) OR ("transient ischaemic attacks"[All Fields] OR "ischemic attack, transient"[MeSH Terms] OR ("ischemic"[All Fields] AND "attack"[All Fields] AND "transient"[All Fields]) OR "transient ischemic attack"[All Fields] OR ("transient"[All Fields] AND "ischemic"[All Fields] AND "attacks"[All Fields]) OR "transient ischemic attacks"[All Fields] OR ("transient ischaemic attack"[All Fields] OR "ischemic attack, transient"[MeSH Terms] OR ("ischemic"[All Fields] AND "attack"[All Fields] AND "transient"[All Fields]) OR "transient ischemic attack"[All Fields] OR ("transient"[All Fields] AND "ischemic"[All Fields] AND "attack"[All Fields])) OR ("transient ischaemic attacks"[All Fields] OR "ischemic attack, transient"[MeSH Terms] OR ("ischemic"[All Fields] AND "attack"[All Fields] AND "transient"[All Fields]) OR "transient ischemic attack"[All Fields] OR ("transient"[All Fields] AND "ischemic"[All Fields] AND "attacks"[All Fields]) OR "transient ischemic attacks"[All Fields]) OR ("heart failure"[MeSH Terms] OR ("heart"[All Fields] AND "failure"[All Fields]) OR "heart failure"[All Fields]) OR ("peripheral arterial disease"[MeSH Terms] OR ("peripheral"[All Fields] AND "arterial"[All Fields] AND "disease"[All Fields]) OR "peripheral arterial disease"[All Fields] OR ("peripheral"[All Fields] AND "artery"[All Fields] AND "disease"[All Fields]) OR "peripheral artery disease"[All Fields] OR ("peripheral arterial disease"[MeSH Terms] OR ("peripheral"[All Fields] AND "arterial"[All Fields] AND "disease"[All Fields]) OR "peripheral arterial disease"[All Fields] OR ("peripheral"[All Fields] AND "artery"[All Fields] AND "diseases"[All Fields]) OR "peripheral artery diseases"[All Fields]) OR ("cardiomyopathy, hypertrophic"[MeSH Terms] OR ("cardiomyopathy"[All Fields] AND "hypertrophic"[All Fields]) OR "hypertrophic cardiomyopathy"[All Fields] OR ("hypertrophic"[All Fields] AND "cardiomyopathy"[All Fields]))

OR ("pneumonia"[MeSH Terms] OR "pneumonia"[All Fields]) OR ("asthma"[MeSH Terms] OR "asthma"[All Fields]) OR ("asthma"[MeSH Terms] OR "asthma"[All Fields] OR "asthmatic"[All Fields]) OR ("pulmonary disease, chronic obstructive"[MeSH Terms] OR ("pulmonary"[All Fields] AND "disease"[All Fields] AND "chronic"[All Fields] AND "obstructive"[All Fields]) OR "chronic obstructive pulmonary disease"[All Fields] OR ("chronic"[All Fields] AND "obstructive"[All Fields] AND "pulmonary"[All Fields] AND "disease"[All Fields])) OR ("Chronic Obstr Pulm Dis"[Journal] OR ("chronic"[All Fields] AND "obstructive"[All Fields] AND "pulmonary"[All Fields] AND "diseases"[All Fields]) OR "chronic obstructive pulmonary diseases"[All Fields]) OR ("pulmonary disease, chronic obstructive"[MeSH Terms] OR ("pulmonary"[All Fields] AND "disease"[All Fields] AND "chronic"[All Fields] AND "obstructive"[All Fields]) OR "chronic obstructive pulmonary disease"[All Fields] OR "copd"[All Fields]) OR ("obstructive sleep apnoea syndrome"[All Fields] OR "sleep apnea, obstructive"[MeSH Terms] OR ("sleep"[All Fields] AND "apnea"[All Fields] AND "obstructive"[All Fields]) OR "obstructive sleep apnea"[All Fields] OR ("obstructive"[All Fields] AND "sleep"[All Fields] AND "apnea"[All Fields] AND "syndrome"[All Fields]) OR "obstructive sleep apnea syndrome"[All Fields])

OR ("pulmonary diseases"[MeSH Terms] OR "pulmonary disease"[All Fields] OR "pulmonary diseases"[All Fields] OR "pulmonary disorders"[MeSH Terms] OR "pulmonary disorder"[All Fields] OR "pulmonary disorders"[All Fields] OR "pulmonary syndromes"[MeSH Terms] OR "pulmonary syndrome"[All Fields] OR "pulmonary syndromes"[All Fields])

OR ("liver"[All Fields] AND "diseases"[All Fields]) OR "liver diseases"[All Fields] OR ("liver"[All Fields] AND "disease"[All Fields]) OR ("liver disease"[All Fields]) OR ("liver diseases"[MeSH Terms] OR ("liver"[All Fields] AND "diseases"[All Fields]) OR "liver diseases"[All Fields]) OR ("gastrointestinal diseases"[MeSH Terms] OR ("gastrointestinal"[All Fields] AND "diseases"[All Fields]) OR "gastrointestinal diseases"[All Fields] OR ("functional"[All Fields] AND "gastrointestinal"[All Fields] AND "disorder"[All Fields]) OR "functional gastrointestinal disorder"[All Fields]) OR ("gastrointestinal diseases"[MeSH Terms] OR ("gastrointestinal"[All Fields] AND "diseases"[All Fields]) OR "gastrointestinal diseases"[All Fields] OR ("functional"[All Fields] AND "gastrointestinal"[All Fields] AND "disorders"[All Fields]) OR "functional gastrointestinal disorders"[All Fields]) OR ("colitis, ulcerative"[MeSH Terms] OR ("colitis"[All Fields] AND "ulcerative"[All Fields]) OR "ulcerative colitis"[All Fields] OR ("ulcerative"[All Fields] AND "colitis"[All Fields])) OR ("crohn disease"[MeSH Terms] OR ("crohn"[All Fields] AND "disease"[All Fields]) OR "crohn disease"[All Fields] OR ("crohn's"[All Fields] AND "disease"[All Fields]) OR "crohn's disease"[All Fields] OR ("crohn disease"[MeSH Terms] OR ("crohn"[All Fields] AND "disease"[All Fields]) OR "crohn disease"[All Fields]) OR ("gastroesophageal reflux"[MeSH Terms] OR ("gastroesophageal"[All Fields] AND "reflux"[All Fields]) OR "gastroesophageal reflux"[All Fields] OR ("gastroesophageal"[All Fields] AND "reflux"[All Fields] AND "disease"[All Fields]) OR "gastroesophageal reflux disease"[All Fields]) OR ("gastroesophageal reflux"[MeSH Terms] OR ("gastroesophageal"[All Fields] AND "reflux"[All Fields]) OR "gastroesophageal reflux"[All Fields]) AND ("disease"[MeSH Terms] OR "disease"[All Fields] OR "diseases"[All Fields])) OR ("gastroesophageal reflux"[MeSH Terms] OR ("gastroesophageal"[All Fields] AND "reflux"[All Fields]) OR "gastroesophageal reflux"[All Fields] OR "gerd"[All Fields])

OR ("pancreatitis, chronic"[MeSH Terms] OR ("pancreatitis"[All Fields] AND "chronic"[All Fields]) OR "chronic pancreatitis"[All Fields] OR ("chronic"[All Fields] AND "pancreatitis"[All Fields]))

OR ("kidney diseases"[MeSH Terms] OR ("kidney"[All Fields] AND "diseases"[All Fields]) OR "kidney diseases"[All Fields] OR ("kidney"[All Fields] AND "disease"[All Fields]) OR "kidney disease"[All Fields]) OR ("kidney diseases"[MeSH Terms] OR ("kidney"[All Fields] AND "diseases"[All Fields]) OR "kidney diseases"[All Fields]) OR ("acute kidney injury"[MeSH Terms] OR ("acute"[All Fields] AND "kidney"[All Fields] AND "injury"[All Fields]) OR "acute kidney injury"[All Fields]) OR ("acute kidney injury"[MeSH Terms] OR ("acute"[All Fields] AND "kidney"[All Fields] AND "injury"[All Fields]) OR "acute kidney injury"[All Fields] OR ("acute"[All Fields] AND "kidney"[All Fields] AND "injuries"[All Fields]) OR "acute kidney injuries"[All Fields]) OR ("renal dialysis"[MeSH Terms] OR ("renal"[All Fields] AND "dialysis"[All Fields]) OR "renal dialysis"[All Fields] OR "dialysis"[All Fields] OR "dialysis"[MeSH Terms]) OR ("kidney calculi"[MeSH Terms] OR ("kidney"[All Fields] AND "calculi"[All Fields]) OR "kidney calculi"[All Fields] OR ("kidney"[All Fields] AND "stone"[All Fields]) OR "kidney stone"[All Fields]) OR ("kidney calculi"[MeSH Terms] OR ("kidney"[All Fields]

AND "calculi"[All Fields]) OR "kidney calculi"[All Fields] OR ("kidney"[All Fields] AND "stones"[All Fields]) OR "kidney stones"[All Fields])

("fractures, bone"[MeSH Terms] OR ("fractures"[All Fields] AND "bone"[All Fields]) OR "bone fractures"[All Fields] OR "fracture"[All Fields]) OR ("fractures, bone"[MeSH Terms] OR ("fractures"[All Fields] AND "bone"[All Fields]) OR "bone fractures"[All Fields] OR "fractures"[All Fields])

OR ("lymphoma"[MeSH Terms] OR "lymphoma"[All Fields]) OR ("anaemia"[All Fields] OR "anemia"[MeSH Terms] OR "anemia"[All Fields]) OR ("anaemias"[All Fields] OR "anemia"[MeSH Terms] OR "anemia"[All Fields] OR "anemias"[All Fields]) OR ("anaemia"[All Fields] OR "anemia"[MeSH Terms] OR "anemia"[All Fields]) OR ("anaemias"[All Fields] OR "anemia"[MeSH Terms] OR "anemia"[All Fields] OR "anemias"[All Fields])

OR ("epilepsy"[MeSH Terms] OR "epilepsy"[All Fields]) OR ("epilepsy"[MeSH Terms] OR "epilepsy"[All Fields] OR "epileptic"[All Fields]) OR ("seizures"[MeSH Terms] OR "seizures"[All Fields] OR "seizure"[All Fields]) OR ("seizures"[MeSH Terms] OR "seizures"[All Fields]) OR ("stroke"[MeSH Terms] OR "stroke"[All Fields]) OR ("stroke"[MeSH Terms] OR "stroke"[All Fields] OR "strokes"[All Fields]) OR ("multiple sclerosis"[MeSH Terms] OR ("multiple"[All Fields] AND "sclerosis"[All Fields]) OR "multiple sclerosis"[All Fields]) OR (autoimmune[All Fields] AND ("brain diseases"[MeSH Terms] OR ("brain"[All Fields] AND "diseases"[All Fields]) OR "brain diseases"[All Fields] OR "encephalopathy"[All Fields])) OR (paraneoplastic[All Fields] AND ("encephalitis"[MeSH Terms] OR "encephalitis"[All Fields])) OR ("peripheral nervous system diseases"[MeSH Terms] OR ("peripheral"[All Fields] AND "nervous"[All Fields] AND "system"[All Fields] AND "diseases"[All Fields]) OR "peripheral nervous system diseases"[All Fields] OR ("peripheral"[All Fields] AND "neuropathy"[All Fields]) OR "peripheral neuropathy"[All Fields])

OR ("parkinson disease"[MeSH Terms] OR ("parkinson"[All Fields] AND "disease"[All Fields]) OR "parkinson disease"[All Fields]) OR ("parkinson disease"[MeSH Terms] OR ("parkinson"[All Fields] AND "disease"[All Fields]) OR "parkinson disease"[All Fields] OR ("parkinson's"[All Fields] AND "disease"[All Fields]) OR "parkinson's disease"[All Fields])

OR ("vitiligo"[MeSH Terms] OR "vitiligo"[All Fields]) OR ("acne vulgaris"[MeSH Terms] OR ("acne"[All Fields] AND "vulgaris"[All Fields]) OR "acne vulgaris"[All Fields] OR "acne"[All Fields]) OR ("melanoma"[MeSH Terms] OR "melanoma"[All Fields]) OR (systemic[All Fields] AND ("lupus vulgaris"[MeSH Terms] OR ("lupus"[All Fields] AND "vulgaris"[All Fields]) OR "lupus vulgaris"[All Fields] OR "lupus"[All Fields] OR "lupus erythematosus, systemic"[MeSH Terms] OR ("lupus"[All Fields] AND "erythematosus"[All Fields] AND "systemic"[All Fields]) OR "systemic lupus erythematosus"[All Fields])) OR ("dermatitis, atopic"[MeSH Terms] OR ("dermatitis"[All Fields] AND "atopic"[All Fields]) OR "atopic dermatitis"[All Fields] OR ("atopic"[All Fields] AND "eczema"[All Fields]) OR "atopic eczema"[All Fields])

OR ("coeliac disease"[All Fields] OR "celiac disease"[MeSH Terms] OR ("celiac"[All Fields] AND "disease"[All Fields]) OR "celiac disease"[All Fields]) OR ("spondylitis, ankylosing"[MeSH Terms] OR ("spondylitis"[All Fields] AND "ankylosing"[All Fields]) OR "ankylosing spondylitis"[All Fields] OR ("ankylosing"[All Fields] AND "spondylitis"[All Fields])) OR ("psoriasis"[MeSH Terms] OR "psoriasis"[All Fields])

OR ("arthritis, rheumatoid"[MeSH Terms] OR ("arthritis"[All Fields] AND "rheumatoid"[All Fields]) OR "rheumatoid arthritis"[All Fields] OR ("rheumatoid"[All Fields] AND "arthritis"[All Fields])) OR ("inflammatory bowel diseases"[MeSH Terms] OR ("inflammatory"[All Fields] AND "bowel"[All Fields] AND "diseases"[All Fields]) OR "inflammatory bowel diseases"[All Fields] OR ("inflammatory"[All Fields] AND "bowel"[All Fields] AND "disease"[All Fields]) OR "inflammatory bowel disease"[All Fields]) OR (Graves's[All Fields] AND ("disease"[MeSH Terms] OR "disease"[All Fields])) OR ("graves disease"[MeSH Terms] OR ("graves"[All Fields] AND "disease"[All Fields]) OR "graves disease"[All Fields])

OR ("neoplasms"[MeSH Terms] OR "neoplasms"[All Fields] OR "neoplasm"[All Fields]) OR ("neoplasms"[MeSH Terms] OR "neoplasms"[All Fields]) OR ("neoplasms"[MeSH Terms] OR "neoplasms"[All Fields] OR "cancer"[All Fields]) OR ("neoplasms"[MeSH Terms] OR "neoplasms"[All Fields] OR "cancers"[All Fields]) OR ("tumour"[All Fields] OR "neoplasms"[MeSH Terms] OR "neoplasms"[All Fields] OR "tumor"[All Fields]) OR ("tumours"[All Fields] OR "neoplasms"[MeSH Terms] OR "neoplasms"[All Fields] OR "tumors"[All Fields])

OR ("hypercholesterolemia"[MeSH Terms] OR "hypercholesterolemia"[All Fields] OR hypercholesterolemia\*[All Fields]) OR ("high cholesterol"[MeSH Terms] OR "high cholesterol"[All Fields])

OR ("hyperthyroidism"[MeSH Terms] OR "hyperthyroidism"[All Fields] OR hyperthyroid\*[All Fields]) OR ("hypothyroidism"[MeSH Terms] OR "hypothyroidism"[All Fields] OR hypothyroid\*[All Fields]) OR ( thyroid\*[All Fields])

OR ("growth diseases"[MeSH Terms] OR "growth disease"[All Fields] OR "growth diseases"[All Fields] OR "growth disorders"[MeSH Terms] OR "growth disorder"[All Fields] OR "growth disorders"[All Fields] OR "growth syndromes"[MeSH Terms] OR "growth syndrome"[All Fields] OR "growth syndromes"[All Fields])

OR ("growth hormone deficiency"[MeSH Terms] OR "growth hormone deficiency"[All Fields] OR "growth hormone deficiencies" [All Fields]) OR ("delayed puberty"[MeSH Terms] OR "delayed puberty"[All Fields]) OR ("precocious puberty"[MeSH Terms] OR "precocious puberty"[All Fields])

OR ("Kawasaki disease"[MeSH Terms] OR "Kawasaki disease"[All Fields] OR "Kawasaki diseases"[All Fields] OR "Kawasaki disorder"[MeSH Terms] OR "Kawasaki disorder"[All Fields] OR "Kawasaki disorders"[All Fields] OR "Kawasaki syndrome"[MeSH Terms] OR "Kawasaki syndrome"[All Fields] OR "Kawasaki syndromes"[All Fields])

OR ("heart defect"[MeSH Terms] OR "heart defect"[All Fields] OR "heart defects"[All Fields]) OR ("ventricular septal defect"[MeSH Terms] OR "ventricular septal defect"[All Fields] OR "ventricular septal defects"[All Fields]) OR ("fallot"[MeSH Terms] OR "Fallot"[All Fields])



OR (“respiratory infection”[MeSH Terms] OR “respiratory infection”[All Fields] OR “respiratory infections”[All Fields])

OR (“respiratory tract infection”[MeSH Terms] OR “respiratory tract infection”[All Fields] OR “respiratory tract infections”[All Fields])

OR (“bronchitis”[MeSH Terms] OR “bronchitis”[All Fields])  
OR (“broncheolitis”[MeSH Terms] OR “broncheolitis”[All Fields])  
OR (“otitis”[MeSH Terms] OR “otitis”[All Fields])  
OR (“tonsillitis”[MeSH Terms] OR “tonsillitis”[All Fields])  
OR (“croup”[MeSH Terms] OR “croup”[All Fields])  
OR (“pharyngitis”[MeSH Terms] OR “pharyngitis”[All Fields])  
OR (“sinusitis”[MeSH Terms] OR “sinusitis”[All Fields])  
OR (“laryngitis”[MeSH Terms] OR “laryngitis”[All Fields])

OR (“mononucleosis”[MeSH Terms] OR “mononucleosis”[All Fields])  
OR (“scarlet fever”[MeSH Terms] OR “scarlet fever”[All Fields])  
OR (“conjunctivitis”[MeSH Terms] OR “conjunctivitis”[All Fields])  
OR (“stye”[MeSH Terms] OR “stye”[All Fields])

OR (“colitis”[MeSH Terms] OR “colitis”[All Fields])  
OR (“cirrhosis”[MeSH Terms] OR “cirrhosis”[All Fields])  
OR (“appendicitis”[MeSH Terms] OR “appendicitis”[All Fields])  
OR (“gastroenteritis”[MeSH Terms] OR “gastroenteritis”[All Fields])  
OR (“peritonitis”[MeSH Terms] OR “peritonitis”[All Fields])  
OR (“gastritis”[MeSH Terms] OR “gastritis”[All Fields])  
OR (“diarrhea”[MeSH Terms] OR “diarrhea”[All Fields] OR “diarrheas”[All Fields])  
OR (“pleurisy”[MeSH Terms] OR “pleurisy”[All Fields])  
OR (“bowel diseases”[MeSH Terms] OR “bowel disease”[All Fields] OR “bowel diseases”[All Fields] OR “bowel disorders”[MeSH Terms] OR “bowel disorder”[All Fields] OR “bowel disorders”[All Fields] OR “bowel syndromes”[MeSH Terms] OR “bowel syndrome”[All Fields] OR “bowel syndromes”[All Fields])  
OR (“constipation”[MeSH Terms] OR constipat\*[All Fields])

OR (“Urinary tract infection”[MeSH Terms] OR “Urinary tract infection”[All Fields] OR “Urinary tract infections”[All Fields])  
OR (“Urinary infection”[MeSH Terms] OR “Urinary infection”[All Fields] OR “Urinary infections”[All Fields])  
OR (“hernia”[MeSH Terms] OR “hernia”[All Fields] OR hernias[All Fields])  
OR (“phimosis”[MeSH Terms] OR “phimosis”[All Fields])

OR (“scoliosis”[MeSH Terms] OR “scoliosis”[All Fields])

OR (“leukemia”[MeSH Terms] OR “leukemia”[All Fields] OR leukemias[All Fields])

OR (“aneurysm”[MeSH Terms] OR “aneurysm”[All Fields] OR aneurysms[All Fields])  
OR (“hydrocephalus”[MeSH Terms] OR “hydrocephal\*”[All Fields])

OR (“encephalopathy”[MeSH Terms] OR “encephalopathy”[All Fields] OR  
encephalopathies[All Fields])  
OR (“encephalitis”[MeSH Terms] OR “encephalitis”[All Fields])  
OR (“neuropathy”[MeSH Terms] OR “neuropathy”[All Fields] OR neuropathies[All Fields])  
OR (“polyneuropathy”[MeSH Terms] OR “polyneuropathy”[All Fields] OR  
polyneuropathies[All Fields])  
OR (“meningitis”[MeSH Terms] OR “meningitis”[All Fields])  
OR (“meningoencephalitis”[MeSH Terms] OR “meningoencephalitis”[All Fields])

OR (“meningococcal disease”[MeSH Terms] OR “meningococcal disease”[All Fields] OR  
“meningococcal diseases”[All Fields])  
OR (“Cerebral edema”[MeSH Terms] OR “Cerebral edema”[All Fields] OR “Cerebral  
edemas”[All Fields])  
OR (“migraine”[MeSH Terms] OR “migraine”[All Fields] OR migraines[All Fields])  
OR (“cephalea”[MeSH Terms] OR “cephalea”[All Fields] OR cephaleas[All Fields])  
OR (“cerebral palsy”[MeSH Terms] OR “cerebral palsy”[All Fields] OR “cerebral  
palsies”[All Fields])

OR (“candidiasis”[MeSH Terms] OR “candidiasis”[All Fields])  
OR (“dermatitis”[MeSH Terms] OR “dermatitis”[All Fields])  
OR (“molluscum”[MeSH Terms] OR “molluscum”[All Fields])  
OR (“scabies”[MeSH Terms] OR “scabies”[All Fields])  
OR (“rosacea”[MeSH Terms] OR “rosacea”[All Fields])  
OR (“hives”[MeSH Terms] OR “hives”[All Fields])  
OR (“rosacea”[MeSH Terms] OR “rosacea”[All Fields] OR rosaceas[All Fields])

OR (“lactose intolerance”[MeSH Terms] OR “lactose intolerance”[All Fields] OR “lactose  
intolerances”[All Fields])  
OR (“milk intolerance”[MeSH Terms] OR “milk intolerance”[All Fields] OR “milk  
intolerances”[All Fields])

OR (“fasciitis”[MeSH Terms] OR “fasciitis”[All Fields])  
OR (“bursiitis”[MeSH Terms] OR “bursiitis”[All Fields])  
OR (“allergy”[MeSH Terms] OR “allergy”[All Fields] OR allergies[All Fields])

OR (“blastoma”[MeSH Terms] OR “blastoma”[All Fields] OR blastomas[All Fields])  
OR (paraneoplas\*[All Fields])  
OR (neoplas\*[All Fields])  
)

AND (Infan\* OR baby OR baby\* OR babies OR toddler\* OR minors OR minors\* OR boy  
OR boys OR boyfriend OR boyhood OR girl\* OR kid OR kids OR child OR child\* OR  
children\* OR schoolchild\* OR schoolchild OR school child[tiab] OR school child\*[tiab] OR  
adolescen\* OR juvenil\* OR youth\* OR teen\* OR under\*age\* OR pubescen\* OR  
pediatrics[mh] OR pediatric\* OR paediatric\* OR peadiatric\* OR school[tiab] OR  
school\*[tiab])

AND (“attention deficit disorder with hyperactivity”[MeSH Terms] OR (“attention”[All  
Fields] AND “deficit”[All Fields] AND “disorder”[All Fields] AND “hyperactivity”[All

Fields]) OR "attention deficit disorder with hyperactivity"[All Fields] OR "adhd"[All Fields] OR ("attention deficit disorder with hyperactivity"[MeSH Terms] OR ("attention"[All Fields] AND "deficit"[All Fields] AND "disorder"[All Fields] AND "hyperactivity"[All Fields]) OR "attention deficit disorder with hyperactivity"[All Fields] OR ("attention"[All Fields] AND "deficit"[All Fields] AND "hyperactivity"[All Fields] AND "disorder"[All Fields]) OR "attention deficit hyperactivity disorder"[All Fields]) OR ("attention deficit disorder with hyperactivity"[MeSH Terms] OR ("attention"[All Fields] AND "deficit"[All Fields] AND "disorder"[All Fields] AND "hyperactivity"[All Fields]) OR "attention deficit disorder with hyperactivity"[All Fields] OR ("attention"[All Fields] AND "deficit"[All Fields]) OR "attention deficit"[All Fields]) OR ("attention deficit disorder with hyperactivity"[MeSH Terms] OR ("attention"[All Fields] AND "deficit"[All Fields] AND "disorder"[All Fields] AND "hyperactivity"[All Fields]) OR "attention deficit disorder with hyperactivity"[All Fields] OR ("hyperkinetic"[All Fields] AND "disorder"[All Fields]) OR "hyperkinetic disorder"[All Fields]) OR ("attention deficit disorder with hyperactivity"[MeSH Terms] OR ("attention"[All Fields] AND "deficit"[All Fields] AND "disorder"[All Fields] AND "hyperactivity"[All Fields]) OR "attention deficit disorder with hyperactivity"[All Fields] OR ("hyperkinetic"[All Fields] AND "syndrome"[All Fields]) OR "hyperkinetic syndrome"[All Fields])

OR ("autistic disorder"[MeSH Terms] OR ("autistic"[All Fields] AND "disorder"[All Fields]) OR "autistic disorder"[All Fields] OR "autism"[All Fields]) OR ("autistic disorder"[MeSH Terms] OR ("autistic"[All Fields] AND "disorder"[All Fields]) OR "autistic disorder"[All Fields] OR "autistic"[All Fields]) OR Asperger[All Fields]

OR ("schizophrenia"[MeSH Terms] OR "schizophrenia"[All Fields]) OR schizophrenic[All Fields] OR ("psychotic disorders"[MeSH Terms] OR ("psychotic"[All Fields] AND "disorders"[All Fields]) OR "psychotic disorders"[All Fields] OR ("psychotic"[All Fields] AND "disorder"[All Fields]) OR "psychotic disorder"[All Fields]) OR ("psychotic disorders"[MeSH Terms] OR ("psychotic"[All Fields] AND "disorders"[All Fields]) OR "psychotic disorders"[All Fields]) OR ("psychotic disorders"[MeSH Terms] OR ("psychotic"[All Fields] AND "disorders"[All Fields]) OR "psychotic disorders"[All Fields] OR "psychosis"[All Fields])

OR ("bipolar disorder"[MeSH Terms] OR ("bipolar"[All Fields] AND "disorder"[All Fields]) OR "bipolar disorder"[All Fields]) OR ("bipolar disorder"[MeSH Terms] OR ("bipolar"[All Fields] AND "disorder"[All Fields]) OR "bipolar disorder"[All Fields] OR ("bipolar"[All Fields] AND "disorders"[All Fields]) OR "bipolar disorders"[All Fields])

OR ("depressive disorder"[MeSH Terms] OR ("depressive"[All Fields] AND "disorder"[All Fields]) OR "depressive disorder"[All Fields] OR "depression"[All Fields] OR "depression"[MeSH Terms]) OR depressive[All Fields] OR ("affect"[MeSH Terms] OR "affect"[All Fields] OR "mood"[All Fields])

OR ("anxiety"[MeSH Terms] OR "anxiety"[All Fields]) OR ("anxiety"[MeSH Terms] OR "anxiety"[All Fields] OR "anxious"[All Fields])

OR ("obsessive-compulsive disorder"[MeSH Terms] OR ("obsessive-compulsive"[All Fields] AND "disorder"[All Fields]) OR "obsessive-compulsive disorder"[All Fields] OR ("obsessive"[All Fields] AND "compulsive"[All Fields] AND "disorder"[All Fields]) OR "obsessive compulsive disorder"[All Fields]) OR ("obsessive-compulsive disorder"[MeSH

Terms] OR ("obsessive-compulsive"[All Fields] AND "disorder"[All Fields]) OR "obsessive-compulsive disorder"[All Fields] OR ("obsessive"[All Fields] AND "compulsive"[All Fields] AND "disorder"[All Fields]) OR "obsessive compulsive disorder"[All Fields] OR OCD[All Fields]

OR ("stress disorders, post-traumatic"[MeSH Terms] OR ("stress"[All Fields] AND "disorders"[All Fields] AND "post-traumatic"[All Fields]) OR "post-traumatic stress disorders"[All Fields] OR "ptsd"[All Fields]) OR (Trauma-related[All Fields] AND ("disease"[MeSH Terms] OR "disease"[All Fields] OR "disorder"[All Fields])) OR (Trauma-related[All Fields] AND ("disease"[MeSH Terms] OR "disease"[All Fields] OR "disorders"[All Fields])) OR (Stress-related[All Fields] AND ("disease"[MeSH Terms] OR "disease"[All Fields] OR "disorder"[All Fields])) OR (Stress-related[All Fields] AND ("disease"[MeSH Terms] OR "disease"[All Fields] OR "disorders"[All Fields]))

OR ("substance-related disorders"[MeSH Terms] OR ("substance-related"[All Fields] AND "disorders"[All Fields]) OR "substance-related disorders"[All Fields] OR ("substance"[All Fields] AND "related"[All Fields] AND "disorder"[All Fields]) OR "substance related disorder"[All Fields]) OR ("substance-related disorders"[MeSH Terms] OR ("substance-related"[All Fields] AND "disorders"[All Fields]) OR "substance-related disorders"[All Fields] OR ("substance"[All Fields] AND "related"[All Fields] AND "disorders"[All Fields]) OR "substance related disorders"[All Fields]) OR (addictive[All Fields] AND ("disease"[MeSH Terms] OR "disease"[All Fields] OR "disorder"[All Fields])) OR ("substance-related disorders"[MeSH Terms] OR ("substance-related"[All Fields] AND "disorders"[All Fields]) OR "substance-related disorders"[All Fields] OR ("substance"[All Fields] AND "disorder"[All Fields]) OR "substance use disorder"[All Fields]) OR ("substance-related disorders"[MeSH Terms] OR ("substance-related"[All Fields] AND "disorders"[All Fields]) OR "substance-related disorders"[All Fields] OR ("substance"[All Fields] AND "disorders"[All Fields]) OR "substance use disorders"[All Fields]) OR ("substance-related disorders"[MeSH Terms] OR ("substance-related"[All Fields] AND "disorders"[All Fields]) OR "substance-related disorders"[All Fields] OR ("substance"[All Fields] AND "abuse"[All Fields] AND "disorder"[All Fields]) OR "substance abuse disorder"[All Fields]) OR ("substance-related disorders"[MeSH Terms] OR ("substance-related"[All Fields] AND "disorders"[All Fields]) OR "substance-related disorders"[All Fields] OR ("substance"[All Fields] AND "abuse"[All Fields]) OR "substance abuse"[All Fields]) AND ("disease"[MeSH Terms] OR "disease"[All Fields] OR "disorders"[All Fields])) OR ("Dipend Patologiche"[Journal] OR ("addiction"[All Fields] AND "disorders"[All Fields]) OR "addiction disorders"[All Fields]) OR ("substance-related disorders"[MeSH Terms] OR ("substance-related"[All Fields] AND "disorders"[All Fields]) OR "substance-related disorders"[All Fields] OR ("drug"[All Fields] AND "abuse"[All Fields]) OR "drug abuse"[All Fields])

OR ("feeding and eating disorders"[MeSH Terms] OR ("feeding"[All Fields] AND "eating"[All Fields] AND "disorders"[All Fields]) OR "feeding and eating disorders"[All Fields] OR ("eating"[All Fields] AND "disorder"[All Fields]) OR "eating disorder"[All Fields]) OR ("feeding and eating disorders"[MeSH Terms] OR ("feeding"[All Fields] AND "eating"[All Fields] AND "disorders"[All Fields]) OR "feeding and eating disorders"[All Fields] OR ("eating"[All Fields] AND "disorders"[All Fields]) OR "eating disorders"[All Fields]) OR ("anorexia"[MeSH Terms] OR "anorexia"[All Fields]) OR ("bulimia"[MeSH Terms] OR "bulimia"[All Fields]) OR ("bulimia"[MeSH Terms] OR "bulimia"[All Fields] OR "binge"[All Fields] AND "eating"[All Fields]) OR "binge eating"[All Fields]) OR



("bulimia"[MeSH Terms] OR "bulimia"[All Fields] OR ("binge"[All Fields] AND "eating"[All Fields]) OR "binge eating"[All Fields]) OR ("sleep wake disorders"[MeSH Terms] OR ("sleep"[All Fields]

AND "wake"[All Fields] AND "disorders"[All Fields]) OR "sleep wake disorders"[All Fields] OR ("sleep"[All Fields] AND "disorder"[All Fields]) OR "sleep disorder"[All Fields] OR ("sleep wake disorders"[MeSH Terms] OR ("sleep"[All Fields] AND "wake"[All Fields] AND "disorders"[All Fields]) OR "sleep wake disorders"[All Fields] OR ("sleep"[All Fields] AND "disorders"[All Fields]) OR "sleep disorders"[All Fields]) OR ("sleep wake disorders"[MeSH Terms] OR ("sleep"[All Fields] AND "wake"[All Fields] AND "disorders"[All Fields]) OR "sleep wake disorders"[All Fields] OR ("sleep"[All Fields] AND "disturbance"[All Fields]) OR "sleep disturbance"[All Fields]) OR ("sleep wake disorders"[MeSH Terms] OR ("sleep"[All Fields] AND "wake"[All Fields] AND "disorders"[All Fields]) OR "sleep wake disorders"[All Fields] OR ("sleep"[All Fields] AND "disturbances"[All Fields]) OR "sleep disturbances"[All Fields]) OR ("sleep initiation and maintenance disorders"[MeSH Terms] OR ("sleep"[All Fields] AND "initiation"[All Fields] AND "maintenance"[All Fields] AND "disorders"[All Fields]) OR "sleep initiation and maintenance disorders"[All Fields] OR "insomnia"[All Fields])

OR ("mental disorders"[MeSH Terms] OR ("mental"[All Fields] AND "disorders"[All Fields]) OR "mental disorders"[All Fields] OR ("mental"[All Fields] AND "disorder"[All Fields]) OR "mental disorder"[All Fields]) OR ("mental disorders"[MeSH Terms] OR ("mental"[All Fields] AND "disorders"[All Fields]) OR "mental disorders"[All Fields]) OR ("mental disorders"[MeSH Terms] OR ("mental"[All Fields] AND "disorders"[All Fields]) OR "mental disorders"[All Fields] OR ("psychiatric"[All Fields] AND "disorder"[All Fields]) OR "psychiatric disorder"[All Fields]) OR ("mental disorders"[MeSH Terms] OR ("mental"[All Fields] AND "disorders"[All Fields]) OR "mental disorders"[All Fields] OR ("psychiatric"[All Fields] AND "disorders"[All Fields]) OR "psychiatric disorders"[All Fields]) OR (psychopathological[All Fields] AND ("disease"[MeSH Terms] OR "disease"[All Fields] OR "disorder"[All Fields])) OR (psychopathological[All Fields] AND ("disease"[MeSH Terms] OR "disease"[All Fields] OR "disorders"[All Fields])) OR (psychopathological[All Fields] AND ("disease"[MeSH Terms] OR "disease"[All Fields] OR "condition"[All Fields])) OR (psychopathological[All Fields] AND conditions[All Fields])

OR ("neurodevelopmental diseases"[MeSH Terms] OR "neurodevelopmental disease"[All Fields] OR "neurodevelopmental diseases"[All Fields] OR "neurodevelopmental disorders"[MeSH Terms] OR "neurodevelopmental disorder"[All Fields] OR "neurodevelopmental disorders"[All Fields] OR "neurodevelopmental syndromes"[MeSH Terms] OR "neurodevelopmental syndrome"[All Fields] OR "neurodevelopmental syndromes"[All Fields]) OR ("developmental diseases"[MeSH Terms] OR "developmental disease"[All Fields] OR "developmental diseases"[All Fields] OR "developmental disorders"[MeSH Terms] OR "developmental disorder"[All Fields] OR "developmental disorders"[All Fields] OR "developmental syndromes"[MeSH Terms] OR "developmental syndrome"[All Fields] OR "developmental syndromes"[All Fields])

OR (neurodevelopmen\*[All Fields] OR developmen\*[All Fields] OR intellec\*[All Fields] OR mental[All Fields] OR mental\*[All Fields] OR learning)

AND (diseas\* OR deficien\* OR difficult\* OR disab\* OR disorder\* OR impair\* OR handicap\* OR incapacit\* OR handicap\* OR subnorm\* OR sub\*)  
)

OR (“intellectual disability”[MeSH Terms])  
OR (low\* intellect\*)

OR (“global developmental delay”[MeSH Terms] OR “global developmental delay”[All Fields] OR “global developmental delays”[All Fields])

OR (“language disorders”[MeSH Terms] OR “language disorder”[All Fields] OR “language disorders”[All Fields] OR “language syndromes”[MeSH Terms] OR “language syndrome”[All Fields] OR “language syndromes”[All Fields])

OR (“communication disorders”[MeSH Terms] OR “communication disorder”[All Fields] OR “communication disorders”[All Fields] OR “communication syndromes”[MeSH Terms] OR “communication syndrome”[All Fields] OR “communication syndromes”[All Fields])

OR (“speech sound disorders”[MeSH Terms] OR “speech sound disorder”[All Fields] OR “speech sound disorders”[All Fields] OR “speech sound syndromes”[MeSH Terms] OR “speech sound syndrome”[All Fields] OR “speech sound syndromes”[All Fields])

OR (“fluency disorders”[MeSH Terms] OR “fluency disorder”[All Fields] OR “fluency disorders”[All Fields] OR “fluency syndromes”[MeSH Terms] OR “fluency syndrome”[All Fields] OR “fluency syndromes”[All Fields])

OR (“stuttering”[MeSH Terms] OR “stutter”[All Fields] OR stutter\*[All Fields])

OR (“social communication disorders”[MeSH Terms] OR “social communication disorder”[All Fields] OR “social communication disorders”[All Fields] OR “social communication syndromes”[MeSH Terms] OR “social communication syndrome”[All Fields] OR “social communication syndromes”[All Fields])

OR (“pragmatic disorders”[MeSH Terms] OR “pragmatic disorder”[All Fields] OR “pragmatic disorders”[All Fields] OR “pragmatic syndromes”[MeSH Terms] OR “pragmatic syndrome”[All Fields] OR “pragmatic syndromes”[All Fields])

OR (“pragmatic communication disorders”[MeSH Terms] OR “pragmatic communication disorder”[All Fields] OR “pragmatic communication disorders”[All Fields] OR “pragmatic communication syndromes”[MeSH Terms] OR “pragmatic communication syndrome”[All Fields] OR “pragmatic communication syndromes”[All Fields])

OR (“learning disorder”[MeSH Terms] OR “learning disorder”[All Fields] OR “learning disorders”[All Fields])

OR (“academic skills disorder”[MeSH Terms] OR “academic skills disorder”[All Fields] OR “academic skills disorders”[All Fields])

OR (“dyslexia”[MeSH Terms] OR “dyslexia”[All Fields] OR “dyslexias”[All Fields])

OR (“reading disorder”[MeSH Terms] OR “reading disorder”[All Fields] OR “reading disorders”[All Fields])

OR (“reading”[All Fields] AND (disorder[All Fields] OR disorders[All Fields]))

OR (“reading difficulty”[MeSH Terms] OR “reading difficulty”[All Fields] OR “reading difficulties”[All Fields])

OR (reading[All Fields] AND (difficulty[All Fields] OR difficulties[All Fields]))

OR (“reading impairment”[MeSH Terms] OR “reading impairment”[All Fields] OR “reading impairments”[All Fields])

OR (“reading”[All Fields] AND (impairment[All Fields] OR impairments[All Fields]))

OR (“developmental coordination disorder”[MeSH Terms] OR “developmental coordination disorder”[All Fields] OR “developmental coordination disorders” [All Fields])  
OR (“coordination disorder”[MeSH Terms] OR “coordination disorder”[All Fields] OR “coordination disorders”[All Fields])  
OR (“motor skills disorder”[MeSH Terms] OR “motor skills disorder”[All Fields] OR “motor skills disorders”[All Fields])

OR (“delusional disorder”[MeSH Terms] OR “delusional disorder”[All Fields] OR “delusional disorders”[All Fields])  
OR (“schizoaffective”[MeSH Terms] OR “schizoaffective”[All Fields] OR “schizoaffectives”[All Fields])

OR (“cyclothymic”[MeSH Terms] OR “cyclothymic”[All Fields] OR “cyclothymia”[All Fields])

OR (“tic disorder”[MeSH Terms] OR “tic disorder”[All Fields] OR “tic disorders”[All Fields])  
OR (“tic”[MeSH Terms] OR “tic”[All Fields] OR tics[All Fields])  
OR (“tourette”[MeSH Terms] OR “tourette”[All Fields] OR “tourette’s”[All Fields])

OR (“elimination disorder”[MeSH Terms] OR “elimination disorder”[All Fields] OR “elimination disorders”[All Fields])  
OR (“enuresis”[MeSH Terms] OR “enuresis”[All Fields])  
OR (“encopresis”[MeSH Terms] OR “encopresis”[All Fields])  
OR (“incontinence”[MeSH Terms] OR “incontinence”[All Fields])

OR (“nightmare disorder”[MeSH Terms] OR “nightmare disorder”[All Fields] OR “nightmare disorders”[All Fields])  
OR (“nightmare”[MeSH Terms] OR “nightmare”[All Fields] OR nightmares[All Fields])  
OR (“dysphoric dream”[MeSH Terms] OR “dysphoric dream”[All Fields] OR “dysphoric dreams”[All Fields])  
OR (“sleep terror”[MeSH Terms] OR “sleep terror”[All Fields] OR “sleep terrors”[All Fields])

OR (“Parasomnia”[MeSH Terms] OR “Parasomnia”[All Fields] OR “Parasomnias”[All Fields])  
OR (“Sleepwalking”[MeSH Terms] OR “Sleepwalking”[All Fields] OR “Sleepwalk”[All Fields])  
OR (“Restless legs syndrome”[MeSH Terms] OR “Restless legs syndrome”[All Fields] OR “Restless legs syndromes”[All Fields])

OR (“impulse control disorder”[MeSH Terms] OR “impulse control disorder”[All Fields] OR “impulse control disorders”[All Fields])

OR (“impulse-control disorder”[MeSH Terms] OR “impulse-control disorder”[All Fields]  
OR “impulse-control disorders”[All Fields])  
OR (“conduct disorder”[MeSH Terms] OR “conduct disorder”[All Fields] OR “conduct  
disorders”[All Fields])  
OR (“disruptive disorder”[MeSH Terms] OR “disruptive disorder”[All Fields] OR  
“disruptive disorders”[All Fields])  
OR (“disruptive behavior”[MeSH Terms] OR “disruptive behavior”[All Fields] OR  
“disruptive behaviors”[All Fields])  
OR (“disruptive behaviour”[MeSH Terms] OR “disruptive behaviour”[All Fields] OR  
“disruptive behaviours”[All Fields])

OR (“oppositional defiant disorder”[MeSH Terms] OR “oppositional defiant disorder”[All  
Fields] OR “oppositional defiant disorders”[All Fields])  
OR (“oppositional disorder”[MeSH Terms] OR “oppositional disorder”[All Fields] OR  
“oppositional disorders”[All Fields])  
OR (“explosive disorder”[MeSH Terms] OR “explosive disorder”[All Fields] OR “explosive  
disorders”[All Fields])

OR (“disruptive mood”[MeSH Terms] OR “disruptive mood”[All Fields] OR “disruptive  
moods”[All Fields])

OR (“separation anxiety”[MeSH Terms] OR “separation anxiety”[All Fields] OR “separation  
anxieties”[All Fields])  
OR (“selective mutism”[MeSH Terms] OR “selective mutism”[All Fields] OR “selective  
mutisms”[All Fields])  
OR (“phobia”[MeSH Terms] OR “phobia”[All Fields] OR “phobias”[All Fields])  
OR (“social anxiety”[MeSH Terms] OR “social anxiety”[All Fields] OR “social  
anxieties”[All Fields])  
OR (“panic disorder”[MeSH Terms] OR “panic disorder”[All Fields] OR “panic  
disorders”[All Fields])  
OR (“agoraphobia”[MeSH Terms] OR “agoraphobia”[All Fields] OR “agoraphobias”[All  
Fields])

OR (“pica”[MeSH Terms] OR “pica”[All Fields])

OR (“rumination disorder”[MeSH Terms] OR “rumination disorder”[All Fields] OR “rumination  
disorders”[All Fields])  
OR (“Avoidant/Restrictive Food Intake Disorder”[MeSH Terms] OR “Avoidant/Restrictive  
Food Intake Disorder”[All Fields] OR “Avoidant/Restrictive Food Intake Disorders”[All  
Fields])  
OR (“Avoidant Food Intake Disorder”[MeSH Terms] OR “Avoidant Food Intake  
Disorder”[All Fields] OR “Avoidant Food Intake Disorders”[All Fields])  
OR (“restrictive Food Intake Disorder”[MeSH Terms] OR “restrictive Food Intake  
Disorder”[All Fields] OR “restrictive Food Intake Disorders”[All Fields])

OR (“Body Dysmorphic Disorder”[MeSH Terms] OR “Body Dysmorphic Disorder”[All  
Fields] OR “Body Dysmorphic Disorders”[All Fields])

OR ("Trichotillomania"[MeSH Terms] OR "Trichotillomania"[All Fields] OR  
 "Trichotillomanias"[All Fields])  
 OR ("Hair-Pulling Disorder"[MeSH Terms] OR "Hair-Pulling Disorder"[All Fields] OR  
 "Hair-Pulling Disorders"[All Fields])  
 OR ("excoriation"[MeSH Terms] OR "excoriation"[All Fields] OR "excoriations"[All  
 Fields])  
 OR ("Skin-Picking disorder"[MeSH Terms] OR "Skin-Picking disorder"[All Fields] OR  
 "Skin-Picking disorders"[All Fields])

OR ("Reactive Attachment"[MeSH Terms] OR "Reactive Attachment"[All Fields] OR  
 "Reactive Attachments"[All Fields])  
 OR ("Disinhibited Social Engagement"[MeSH Terms] OR "Disinhibited Social  
 Engagement"[All Fields] OR "Disinhibited Social Engagements"[All Fields])

OR ("dissociative disorder"[MeSH Terms] OR "dissociative disorder"[All Fields] OR  
 "dissociative disorders"[All Fields])  
 OR ("dissociative identity disorder"[MeSH Terms] OR "dissociative identity disorder"[All  
 Fields] OR "dissociative identity disorders"[All Fields])

OR ("Gender dysphoria"[MeSH Terms] OR "Gender dysphoria"[All Fields] OR "Gender  
 dysphorias"[All Fields])

)

AND (  
 ("systematic review"[Publication Type] OR "systematic reviews as topic"[MeSH Terms] OR  
 "systematic review"[All Fields])  
 OR ("systematic review"[Publication Type] OR "systematic reviews as topic"[MeSH Terms]  
 OR "systematic reviews"[All Fields])  
 OR ("meta-analysis"[Publication Type] OR "meta-analysis as topic"[MeSH Terms] OR  
 "meta-analysis"[All Fields])  
 OR meta-analytic[All Fields]  
 OR (  
 "meta-analysis as topic"[MeSH Terms] OR ("meta-analysis"[All Fields] AND "topic"[All  
 Fields])  
 OR "meta-analysis as topic"[All Fields] OR "metaanalysis"[All Fields]  
 )  
 OR ("meta-analysis"[Publication Type] OR "meta-analysis as topic"[MeSH Terms] OR  
 "meta-analysis"[All Fields])  
 OR metaanalytic[All Fields] OR metanalyses[All Fields]  
 OR ("meta-analysis"[Publication Type] OR "meta-analysis as topic"[MeSH Terms] OR  
 "meta-analyses"[All Fields])  
 OR ("meta-analysis"[Publication Type] OR "meta-analysis as topic"[MeSH Terms] OR  
 "meta-analyses"[All Fields])  
 OR metaanalyses[All Fields] OR meta-review[All Fields] OR meta-reviews[All Fields]  
 OR (umbrella[All Fields] AND ("review"[Publication Type] OR "review literature as  
 topic"[MeSH Terms] OR "review"[All Fields]))



OR (umbrella[All Fields] AND ("review"[Publication Type] OR "review literature as topic"[MeSH Terms] OR "reviews"[All Fields]))

)

Limits: **none**

### **OVID databases (PsycInfo, EMBASE+EMBASE classic, OVID Medline)**

(Obesity OR obese OR overweight OR over weight OR dyslipidemia OR diabetes OR diabetic OR thyroid disorder OR thyroid disorders OR coronary heart disease OR coronary heart diseases OR sudden cardiac death OR cerebrovascular disease OR cerebrovascular diseases OR cerebro vascular disease OR cerebro vascular diseases OR cerebral vascular disease OR cerebral vascular diseases OR hypertension OR hypertensive OR myocarditis OR angina OR transient ischemic attack OR transient ischemic attacks OR transient ischaemic attack OR transient ischaemic attacks OR heart failure OR peripheral artery disease OR peripheral artery diseases OR hypertrophic cardiomyopathy OR pneumonia OR asthma OR asthmatic OR chronic obstructive pulmonary disease OR chronic obstructive pulmonary diseases OR COPD OR obstructive sleep apnea syndrome OR influenza OR liver disease OR liver diseases OR functional gastrointestinal disorder OR functional gastrointestinal disorders OR ulcerative colitis OR Crohn disease OR gastroesophageal reflux disease OR gastroesophageal reflux diseases OR GERD OR chronic pancreatitis OR kidney disease OR kidney diseases OR acute kidney injury OR acute kidney injuries OR dialysis OR kidney stone OR kidney stones OR fracture OR fractures OR lymphoma OR anemia OR anemias OR anaemia OR anaemias OR epilepsy OR epileptic OR seizure OR seizures OR stroke OR strokes OR multiple sclerosis OR autoimmune encephalopathy OR paraneoplastic encephalitis OR peripheral neuropathy OR vitiligo OR acne OR melanoma OR systemic lupus OR atopic eczema OR celiac disease OR ankylosing spondylitis OR psoriasis OR rheumatoid arthritis OR inflammatory bowel disease OR Graves disease OR Neoplasm OR Neoplasms OR cancer OR cancers OR tumor OR tumors

OR hyperthyroidism

OR hypercholesterolemia OR high cholesterol OR hyperthyroidism OR hypothyroidism OR growth diseases OR growth disease OR growth disorders OR growth disorder OR growth syndromes OR growth syndrome OR growth hormone deficiency OR growth hormone deficiencies OR delayed puberty OR precocious puberty OR Kawasaki disease OR Kawasaki diseases OR Kawasaki disorder OR Kawasaki disorders OR Kawasaki syndrome OR Kawasaki syndromes OR heart defect OR heart defects

OR ventricular septal defect OR ventricular septal defects OR fallot

OR respiratory infection OR respiratory infections OR respiratory tract infection OR respiratory tract infections

OR bronchitis OR broncheolitis OR otitis OR tonsillitis OR croup OR pharyngitis OR sinusitis OR laryngitis OR mononucleosis OR scarlet fever OR conjunctivitis OR stye OR colitis OR cirrhosis OR appendicitis OR gastroenteritis OR peritonitis OR gastritis OR diarrhea OR diarrheas OR pleurisy OR bowel diseases OR bowel disease OR bowel disorders OR bowel disorder OR bowel syndromes OR bowel syndrome OR constipation

OR Urinary tract infection OR Urinary tract infections OR Urinary infection OR Urinary infections OR hernia OR hernias

OR phimosis OR scoliosis OR leukemia leukemias OR aneurysm OR aneurysms

OR hydrocephalus OR encephalopathy OR encephalopathies OR encephalitis OR neuropathy  
OR neuropathies OR polyneuropathy OR polyneuropathies  
OR meningitis OR meningoencephalitis

OR meningococcal disease OR meningococcal diseases OR Cerebral edema OR Cerebral  
edemas OR migraine OR migraines OR cephalaea OR cephalaeas OR cerebral palsy OR  
cerebral palsies

OR candidiasis OR dermatitis OR molluscum OR scabies OR rosacea OR hives  
OR rosacea OR rosaceas OR lactose intolerance OR lactose intolerances OR milk intolerance  
OR milk intolerances

OR fasciitis OR bursitis OR allergy OR allergies

OR blastoma OR blastomas OR paraneoplasia OR neoplasia  
) ,ti,ts

AND

(  
ADHD OR attention-deficit hyperactivity disorder OR attention deficit OR hyperkinetic  
disorder OR hyperkinetic syndrome OR Autism OR autistic OR Asperger OR Schizophrenia  
OR schizophrenic OR psychotic disorder OR psychotic disorders OR psychosis OR Bipolar  
disorder OR bipolar disorders OR Depression OR depressive OR mood OR Anxiety OR  
anxious OR Obsessive-compulsive disorder OR Obsessive compulsive disorder OR OCD OR  
PTSD OR Trauma-related disorder OR Trauma-related disorders OR Stress-related disorder  
OR Stress-related disorders OR Substance-related disorder OR Substance-related disorders  
OR addictive disorder OR addiction disorders OR drug abuse OR eating disorder OR eating  
disorders OR anorexia OR bulimia OR binge-eating OR binge eating OR sleep disorder OR  
sleep disorders OR sleep disturbance OR sleep disturbances OR insomnia OR mental  
disorder OR mental disorders OR psychiatric disorder OR psychiatric disorders OR  
psychopathological disorder OR psychopathological disorders OR psychopathological  
condition OR psychopathological conditions

OR (  
(neurodevelopmental OR neurodevelopment OR neurodevelopmentally  
OR developmental OR development OR developmentally  
OR intellectual OR intellect OR intellectually  
OR mental OR mentally  
OR learning)

AND

(diseases OR disease OR syndrome OR syndromes OR disorder OR disorders OR deficiency  
OR deficiencies OR deficient OR deficient OR difficulty OR difficulties OR disability OR  
disabilities OR disabled OR impairment OR impairing OR impaired OR handicap OR  
handicapped OR handicapping OR incapacitating OR incapacitated OR incapacity OR  
subnormal OR subnormally)

)

OR language disorders OR language disorder OR language syndromes OR language syndrome OR communication disorders OR communication disorder OR communication syndromes OR communication syndrome OR speech sound disorders OR speech sound disorder OR speech sound syndromes OR speech sound syndrome  
OR fluency disorders OR fluency disorder OR fluency syndromes OR fluency syndrome OR stuttering OR stutter OR social communication disorders OR social communication disorder OR social communication syndromes OR social communication syndrome

OR pragmatic disorders OR pragmatic disorder OR pragmatic syndromes OR pragmatic syndrome OR pragmatic communication disorders OR pragmatic communication disorder OR pragmatic communication syndromes OR pragmatic communication syndrome OR learning disorder OR learning disorders  
OR academic skills disorder OR academic skills disorders

OR dyslexia OR dyslexias OR reading disorder OR reading disorders

OR (reading AND (disorder OR disorders OR difficulty OR reading difficulties or impairment OR impairments OR impaired))

OR developmental coordination disorder OR developmental coordination disorders  
OR coordination disorder OR coordination disorders  
OR motor skills disorder OR motor skills disorders

OR tic disorder OR tic disorders  
OR tic OR tics  
OR tourette OR tourette's

OR elimination disorder OR elimination disorders  
OR enuresis  
OR encopresis  
OR incontinence

OR nightmare disorder OR nightmare disorders  
OR nightmare OR nightmares  
OR dysphoric dream OR dysphoric dreams  
OR sleep terror OR sleep terrors

OR impulse control disorder OR impulse control disorders  
OR impulse-control disorder OR impulse-control disorders  
OR conduct disorder OR conduct disorders  
OR disruptive disorder OR disruptive disorders  
OR disruptive behavior OR disruptive behaviors  
OR disruptive behaviour OR disruptive behaviours

OR oppositional defiant disorder OR oppositional defiant disorders  
OR oppositional disorder OR oppositional disorders  
OR explosive disorder OR explosive disorders

OR disruptive mood OR disruptive moods

OR separation anxiety OR separation anxieties

OR selective mutism OR selective mutisms

OR phobia OR phobias

OR social anxiety OR social anxieties

OR panic disorder OR panic disorders

OR agoraphobia OR agoraphobias

OR pica

OR Reactive Attachment OR Reactive Attachments

OR Disinhibited Social Engagement OR Disinhibited Social Engagements

OR (global developmental delay OR global developmental delays)

OR (delusional disorder OR delusional disorders)

OR (schizoaffective OR schizoaffectives)

OR (cyclothymic OR cyclothymia)

OR (Body Dysmorphic Disorder OR Body Dysmorphic Disorders)

OR (Trichotillomania OR Trichotillomaniacs)

OR (Hair Pulling Disorder OR Hair Pulling Disorders)

OR (excoriation OR excoriations)

OR (Skin Picking disorder OR Skin Picking disorders)

OR (dissociative disorder OR dissociative disorder OR dissociative disorders)

OR (dissociative identity disorder OR dissociative identity disorders)

OR (rumination disorder OR rumination disorders)

OR (Avoidant/Restrictive Food Intake Disorder OR Avoidant/Restrictive Food Intake Disorders)

OR (Avoidant Food Intake Disorder OR Avoidant Food Intake Disorders)

OR (restrictive Food Intake Disorder OR restrictive Food Intake Disorders)

OR (Gender dysphoria OR Gender dysphorias)

OR (Parasomnia OR Parasomnias)

OR (Sleepwalking OR Sleepwalk)

OR (Restless legs syndrome OR Restless legs syndromes)

).ti,ts

AND (systematic review OR systematic reviews OR meta-analysis OR meta-analytic OR metaanalysis OR meta analysis OR metanalytic OR metanalyses OR meta-analyses OR meta analyses OR metaanalyses OR meta-review OR meta-reviews OR umbrella review OR umbrella reviews)

AND

(  
Infant OR infancy OR infantile Or baby OR babies OR toddler OR minor OR minors OR boy  
OR boys OR boyfriend OR boyhood OR girl OR kid OR kids OR child OR childhood OR  
schoolchild OR school OR schoolchildren OR adolescence OR adolescent OR juvenile OR  
juvenile OR youth OR teen OR teenage OR teenager OR underage OR pubescent OR  
pubescence OR pediatric OR pediatrics OR paediatric OR paediatrics  
) .ti,ts

Limits: **none**

**WEB OF SCIENCE databases (Web of Science Core Collection, Biological Abstracts, BIOSIS Citation Index, Current Contents Connect, Data Citation Index, Derwent, Innovations Index, FSTA® - the food science resource, KCI-Korean Journal Database MEDLINE®, Russian Science Citation Index, SciELO Citation Index, Zoological Record)**

TS=(

(  
Obesity OR obese OR overweight OR over weight OR dyslipidemia OR diabetes OR diabetic  
OR thyroid disorder OR thyroid disorders OR coronary heart disease OR coronary heart  
diseases OR sudden cardiac death OR cerebrovascular disease OR cerebrovascular diseases  
OR cerebro vascular disease OR cerebro vascular diseases OR cerebral vascular disease OR  
cerebral vascular diseases OR hypertension OR hypertensive OR myocarditis OR angina OR  
transient ischemic attack OR transient ischemic attacks OR transient ischaemic attack OR  
transient ischaemic attacks OR heart failure OR peripheral artery disease OR peripheral  
artery diseases OR hypertrophic cardiomyopathy OR pneumonia OR asthma OR asthmatic  
OR chronic obstructive pulmonary disease OR chronic obstructive pulmonary diseases OR  
COPD OR obstructive sleep apnea syndrome OR influenza OR liver disease OR liver  
diseases OR functional gastrointestinal disorder OR functional gastrointestinal disorders OR  
ulcerative colitis OR Crohn disease OR gastroesophageal reflux disease  
OR gastroesophageal reflux diseases OR GERD OR chronic pancreatitis OR kidney disease  
OR kidney diseases OR acute kidney injury OR acute kidney injuries OR dialysis OR kidney  
stone OR kidney stones OR fracture OR fractures OR lymphoma OR anemia OR anemias  
OR anaemia OR anaemias OR epilepsy OR epileptic OR seizure OR seizures OR stroke OR  
strokes OR multiple sclerosis OR autoimmune encephalopathy OR paraneoplastic  
encephalitis OR peripheral neuropathy OR vitiligo OR acne OR melanoma OR systemic  
lupus OR atopic eczema OR celiac disease OR ankylosing spondylitis OR psoriasis OR  
rheumatoid arthritis OR inflammatory bowel disease OR Graves disease OR Neoplasm OR  
Neoplasms OR cancer OR cancers OR tumor OR tumors

OR hyperthyroidism

OR hypercholesterolemia OR high cholesterol OR hyperthyroidism OR hypothyroidism  
OR growth diseases OR growth disease OR growth disorders OR growth disorder OR growth  
syndromes OR growth syndrome OR growth hormone deficiency OR growth hormone  
deficiencies OR delayed puberty OR precocious puberty OR Kawasaki disease OR Kawasaki  
diseases OR Kawasaki disorder OR Kawasaki disorders OR Kawasaki syndrome OR  
Kawasaki syndromes OR heart defect OR heart defects



OR ventricular septal defect OR ventricular septal defects OR fallot  
OR respiratory infection OR respiratory infections OR respiratory tract infection OR  
respiratory tract infections

OR bronchitis OR broncheolitis OR otitis OR tonsillitis OR croup OR pharyngitis OR  
sinusitis OR laryngitis OR mononucleosis OR scarlet fever OR conjunctivitis OR stye OR  
colitis OR cirrhosis OR appendicitis OR gastroenteritis OR peritonitis OR gastritis OR  
diarrhea OR diarrheas OR pleurisy OR bowel diseases OR bowel disease OR bowel disorders  
OR bowel disorder OR bowel syndromes OR bowel syndrome  
OR constipation

OR Urinary tract infection OR Urinary tract infections OR Urinary infection OR Urinary  
infections OR hernia OR hernias  
OR phimosis OR scoliosis OR leukemia leukemias OR aneurysm OR aneurysms  
OR hydrocephalus OR encephalopathy OR encephalopathies OR encephalitis OR neuropathy  
OR neuropathies OR polyneuropathy OR polyneuropathies  
OR meningitis OR meningoencephalitis

OR meningococcal disease OR meningococcal diseases OR Cerebral edema OR Cerebral  
edemas OR migraine OR migraines OR cephalgia OR cephalgias OR cerebral palsy OR  
cerebral palsies

OR candidiasis OR dermatitis OR molluscum OR scabies OR rosacea OR hives  
OR rosacea OR rosaceas OR lactose intolerance OR lactose intolerances OR milk intolerance  
OR milk intolerances

OR fasciitis OR bursitis OR allergy OR allergies

OR blastoma OR blastomas OR paraneoplasia OR neoplasia

)

AND

(

ADHD OR attention-deficit hyperactivity disorder OR attention deficit OR hyperkinetic  
disorder OR hyperkinetic syndrome OR Autism OR autistic OR Asperger OR Schizophrenia  
OR schizophrenic OR psychotic disorder OR psychotic disorders OR psychosis OR Bipolar  
disorder OR bipolar disorders OR Depression OR depressive OR mood OR Anxiety OR  
anxious OR Obsessive-compulsive disorder OR Obsessive compulsive disorder OR OCD OR  
PTSD OR Trauma-related disorder OR Trauma-related disorders OR Stress-related disorder  
OR Stress-related disorders OR Substance-related disorder OR Substance-related disorders  
OR addictive disorder OR addiction disorders OR drug abuse OR eating disorder OR eating  
disorders OR anorexia OR bulimia OR binge-eating OR binge eating OR sleep disorder OR  
sleep disorders OR sleep disturbance OR sleep disturbances OR insomnia OR mental  
disorder OR mental disorders OR psychiatric disorder OR psychiatric disorders OR  
psychopathological disorder OR psychopathological disorders OR psychopathological  
condition OR psychopathological conditions

OR (

(neurodevelopmental OR neurodevelopment OR neurodevelopmentally  
OR developmental OR development OR developmentally

OR intellectual OR intellect OR intellectually  
OR mental OR mentally  
OR learning)  
AND  
(diseases OR disease OR syndrome OR syndromes OR disorder OR disorders OR deficiency  
OR deficiencies OR deficient OR deficient OR difficulty OR difficulties OR disability OR  
disabilities OR disabled OR impairment OR impairing OR impaired OR handicap OR  
handicapped OR handicapping OR incapacitating OR incapacitated OR incapacity OR  
subnormal OR subnormally)  
)

OR language disorders OR language disorder OR language syndromes OR language  
syndrome OR communication disorders OR communication disorder OR communication  
syndromes OR communication syndrome OR speech sound disorders OR speech sound  
disorder OR speech sound syndromes OR speech sound syndrome  
OR fluency disorders OR fluency disorder OR fluency syndromes OR fluency syndrome OR  
stuttering OR stutter OR social communication disorders OR social communication disorder  
OR social communication syndromes OR social communication syndrome

OR pragmatic disorders OR pragmatic disorder OR pragmatic syndromes OR pragmatic  
syndrome OR pragmatic communication disorders OR pragmatic communication disorder  
OR pragmatic communication syndromes OR pragmatic communication syndrome OR  
learning disorder OR learning disorders  
OR academic skills disorder OR academic skills disorders

OR dyslexia OR dyslexias OR reading disorder OR reading disorders

OR (reading AND (disorder OR disorders OR difficulty OR reading difficulties or  
impairment OR impairments OR impaired))

OR developmental coordination disorder OR developmental coordination disorders  
OR coordination disorder OR coordination disorders  
OR motor skills disorder OR motor skills disorders

OR tic disorder OR tic disorders  
OR tic OR tics  
OR tourette OR tourette's

OR elimination disorder OR elimination disorders  
OR enuresis  
OR encopresis  
OR incontinence

OR nightmare disorder OR nightmare disorders  
OR nightmare OR nightmares  
OR dysphoric dream OR dysphoric dreams  
OR sleep terror OR sleep terrors

OR impulse control disorder OR impulse control disorders  
OR impulse-control disorder OR impulse-control disorders  
OR conduct disorder OR conduct disorders  
OR disruptive disorder OR disruptive disorders  
OR disruptive behavior OR disruptive behaviors  
OR disruptive behaviour OR disruptive behaviours

OR oppositional defiant disorder OR oppositional defiant disorders  
OR oppositional disorder OR oppositional disorders  
OR explosive disorder OR explosive disorders

OR disruptive mood OR disruptive moods

OR separation anxiety OR separation anxieties  
OR selective mutism OR selective mutisms  
OR phobia OR phobias  
OR social anxiety OR social anxieties  
OR panic disorder OR panic disorders  
OR agoraphobia OR agoraphobias

OR pica

OR Reactive Attachment OR Reactive Attachments  
OR Disinhibited Social Engagement OR Disinhibited Social Engagements

OR (global developmental delay OR global developmental delays)

OR (delusional disorder OR delusional disorders)  
OR (schizoaffective OR schizoaffectives)

OR (cyclothymic OR cyclothymia)

OR (Body Dysmorphic Disorder OR Body Dysmorphic Disorders)  
OR (Trichotillomania OR Trichotillomaniacs)  
OR (Hair Pulling Disorder OR Hair Pulling Disorders)  
OR (excoriation OR excoriations)  
OR (Skin Picking disorder OR Skin Picking disorders)

OR (dissociative disorder OR dissociative disorder OR dissociative disorders)  
OR (dissociative identity disorder OR dissociative identity disorders)

OR (rumination disorder OR rumination disorders)  
OR (Avoidant/Restrictive Food Intake Disorder OR Avoidant/Restrictive Food Intake Disorders)  
OR (Avoidant Food Intake Disorder OR Avoidant Food Intake Disorders)  
OR (restrictive Food Intake Disorder OR restrictive Food Intake Disorders)

OR (Gender dysphoria OR Gender dysphorias)

OR (Parasomnia OR Parasomnias)  
OR (Sleepwalking OR Sleepwalk)  
OR (Restless legs syndrome OR Restless legs syndromes)

)

AND (systematic review OR systematic reviews OR meta-analysis OR meta-analytic OR metaanalysis OR meta analysis OR metanalytic OR metanalyses OR meta-analyses OR meta analyses OR metaanalyses OR meta-review OR meta-reviews OR umbrella review OR umbrella reviews)

AND

(

Infant OR infancy OR infantile Or baby OR babies OR toddler OR minor OR minors OR boy OR boys OR boyfriend OR boyhood OR girl OR kid OR kids OR child OR childhood OR schoolchild OR school OR schoolchildren OR adolescence OR adolescent OR juvenile OR juvenile OR youth OR teen OR teenage OR teenager OR underage OR pubescent OR pubescence OR pediatric OR pediatrics OR paediatric OR paediatrics

)

)





## APPENDIX 2

### List of somatic conditions considered for AMASU-A

*Terms in italics are those not included in Correll CU, Detraux J, De Lepeleire J, De Hert M. Effects of antipsychotics, antidepressants and mood stabilizers on risk for physical diseases in people with schizophrenia, depression and bipolar disorder. World Psychiatry. 2015;14(2):119-136.*

1. Nutritional and metabolic diseases: obesity, dyslipidemia; metabolic syndrome;
2. Endocrine system diseases: diabetes type 1 and 2, thyroid disorders; Cushing's syndrome
3. Cardiovascular diseases: coronary heart disease/sudden cardiac death, stroke, cerebrovascular disease, hypertension, myocarditis, *angina, transient ischemic attack; heart failure, peripheral artery disease, hypertrophic cardiomyopathy;*
4. Respiratory tract diseases: pneumonia, *asthma; COPD; obstructive sleep apnea syndrome, influenza;*
5. Gastrointestinal diseases: liver diseases, *functional gastrointestinal disorders ulcerative colitis, Crohns' disease; GERD; gastritis, chronic pancreatitis, irritable bowel syndrome;*
6. Urogenital diseases: kidney diseases: *chronic kidney disease/chronic renal failure/dialysis; acute kidney injury; benign prostatic hyperplasia; kidney stones;*
7. Musculoskeletal diseases: osteoporosis, *fractures;*
8. Haematologic diseases: *lymphoma; myeloproliferative disorders; anemias;*
9. Neurologic disorders: *epilepsy, seizure, multiple sclerosis, autoimmune encephalopathy, paraneoplastic encephalitis, peripheral neuropathy; dementia; Parkinson disease;*
10. Skin diseases: *vitiligo, acne, melanoma, hidradenitis suppurativa;*

*11. Auto-immune disorders: systemic lupus, atopic eczema, celiac disease, ankylosing spondylitis; psoriasis, rheumatoid arthritis, inflammatory bowel disease, Graves's disease;*

*12. Neoplasms: cancer*

### **List of somatic conditions considered for AMASU-PED**

1. Nutritional and metabolic diseases: Obesity, Dyslipidemia, Hypercholesterolemia
2. Endocrine system diseases: diabetes mellitus, thyroid disorders (with emphasis in hyperthyroidism, hypothyroidism), growth disorders (with emphasis in growth hormone deficiency, delayed puberty, precocious puberty)
3. Cardiovascular diseases: coronary heart disease/sudden cardiac death, cerebrovascular disease, hypertension, myocarditis, angina, transient ischemic attack; heart failure, peripheral artery disease, hypertrophic cardiomyopathy, Kawasaki disease, congenital heart defects (with emphasis in ventricular septal defect, Fallot tetralogy)
4. Respiratory tract diseases: pneumonia, asthma; COPD; obstructive sleep apnea syndrome, influenza, respiratory infections (with emphasis in respiratory tract infections, bronchitis, bronchiolitis, tonsillitis, croup, pharyngitis, sinusitis, laryngitis)
5. Common infection disorders: mononucleosis, scarlet fever, conjunctivitis, stye, otitis
6. Gastrointestinal diseases: liver diseases, functional gastrointestinal disorders, ulcerative colitis, Crohns' disease; GERD; chronic pancreatitis, colitis, cirrhosis, appendicitis, gastroenteritis, peritonitis, gastritis, diarrhea, pleurisy, bowel disorders, constipation
7. Urogenital diseases: kidney diseases: chronic Kidney disease/dialysis; acute kidney injury;; kidney stones. Urinary infections (with emphasis in Urinary tract infection), hernia, phimosis
8. Musculoskeletal diseases:, fracture, scoliosis
9. Haematologic diseases: lymphoma, anemias, leukemia

10. Neurologic disorders: epilepsy, seizure, stroke, multiple sclerosis, autoimmune encephalopathy, paraneoplastic encephalitis, peripheral neuropathy; aneurysm, hydrocephalus, encephalitis, meningitis, meningoencephalitis, meningococcal disease, Cerebral edema, migraine, cephalgia, cerebral palsy
11. Skin diseases: vitiligo, acne, melanoma, candidiasis, dermatitis, molluscum, scabies, rosacea, hives, rosacea
12. Auto-immune disorders: systemic lupus, atopic eczema, celiac disease, ankylosing spondylitis; psoriasis, rheumatoid arthritis, inflammatory bowel disease, Graves's disease, lactose intolerance, fasciitis, bursitis, allergy
13. Neoplasms: cancer

## APPENDIX 3

### List of mental disorders considered for AMASU-A

#### **Neurodevelopmental Disorders**

##### **Intellectual Disabilities**

Intellectual Disability (Intellectual Developmental Disorder)

Global Developmental Delay

##### **Autism Spectrum Disorder**

Autism Spectrum Disorder

##### **Attention-Deficit/Hyperactivity Disorder**

Attention-Deficit/Hyperactivity Disorder

#### **Schizophrenia Spectrum and Other Psychotic Disorders**

Schizotypal (Personality) Disorder

"Delusional Disorder"

Brief Psychotic Disorder

Schizophrenia

Schizoaffective Disorder

#### **Bipolar and Related Disorders**

Bipolar I Disorder

Bipolar II Disorder

Cyclothymic Disorder

#### **Depressive Disorders**

Disruptive Mood Dysregulation Disorder

Major Depressive Disorder, Single and Recurrent Episodes

Persistent Depressive Disorder (Dysthymia)

#### **Anxiety Disorders**

Social Anxiety Disorder (Social Phobia)

Panic Disorder

Panic Attack (Specifier)

Agoraphobia

Generalized Anxiety Disorder

#### **Obsessive-Compulsive and Related Disorders**

Obsessive-Compulsive Disorder

Body Dysmorphic Disorder

Hoarding Disorder

Trichotillomania (Hair-Pulling Disorder)

Excoriation (Skin-Picking) Disorder

#### **Trauma- and Stressor-Related Disorders**

Posttraumatic Stress Disorder

Acute Stress Disorder

#### **Dissociative Disorders**

Dissociative Identity Disorder

#### **Somatic Symptom and Related Disorders**



Somatic Symptom Disorder

Illness Anxiety Disorder

Conversion Disorder (Functional Neurological Symptom Disorder)

**Feeding and Eating Disorders**

Anorexia Nervosa

Bulimia Nervosa

Binge-Eating Disorder

**Elimination Disorders**

**Sleep-Wake Disorders**

Insomnia Disorder

**Gender Dysphoria**

Antisocial Personality Disorder

**Substance-Related and Addictive Disorders**

**Neurocognitive Disorders**

Major and Mild Neurocognitive Disorders

Major Neurocognitive Disorder

Mild Neurocognitive Disorder

Major or Mild Frontotemporal Neurocognitive Disorder

Major or Mild Neurocognitive Disorder With Lewy Bodies

Major or Mild Neurocognitive Disorder Due to Huntington's Disease

**Personality Disorders**

General Personality Disorder

**Cluster A Personality Disorders**

Paranoid Personality Disorder

Schizoid Personality Disorder

Schizotypal Personality Disorder

**Cluster B Personality Disorders**

Antisocial Personality Disorder

Borderline Personality Disorder

Histrionic Personality Disorder

Narcissistic Personality Disorder

**Cluster C Personality Disorders**

Avoidant Personality Disorder

Dependent Personality Disorder

Obsessive-Compulsive Personality Disorder

**Paraphilic Disorders**

Voyeuristic Disorder

Exhibitionistic Disorder

Frotteuristic Disorder

Sexual Masochism Disorder

Sexual Sadism Disorder

Pedophilic Disorder

Fetishistic Disorder

Transvestic Disorder

### **List of mental disorders considered for AMASU-PED**

#### **1) Neurodevelopmental disorders**

- a) Intellectual disabilities (intellectual developmental disorder, global developmental delay)
- b) Autism spectrum disorder (with an emphasis on Asperger's disorder)
- c) Attention-Deficit/Hyperactivity Disorder (ADHD) or Hyperkinetic Syndrome or Hyperkinetic Disorder
- d) Communication Disorders (with emphasis in Language Disorder, Speech Sound Disorder, Childhood-Onset Fluency Disorder (Stuttering), Social (Pragmatic) Communication Disorder)
- e) Specific learning disorders (with an emphasis in dyslexia)
- f) Motor skills disorder (with an emphasis in Developmental coordination disorder)
- g) Tic disorders (with an emphasis in Tourette's disorder)

#### **2) Schizophrenia spectrum and other psychotic disorders** (Schizophrenia, psychosis, delusional disorder, brief psychotic disorder, schizoaffective)

#### **3) Bipolar and related disorders** (bipolar, cyclothymic disorder)

#### **4) Depressive disorders** (this and the previous are part of mood disorders, with emphasis in Disruptive Mood Dysregulation Disorder)

#### **5) Anxiety disorders** (with emphasis in Separation anxiety disorder, selective mutism, Phobia, Social anxiety disorder, panic disorder, agoraphobia)

#### **6) Obsessive-compulsive and related disorders** [obsessive-compulsive, Body Dysmorphic Disorder, Trichotillomania (Hair-Pulling Disorder), Excoriation (Skin-Picking) Disorder]

#### **7) Trauma- and stressor-related disorders** (with emphasis in Reactive Attachment Disorder; Disinhibited Social Engagement Disorder)

#### **8) Dissociative disorders** (dissociative identity disorder)

- 9) **Eating disorders** (with an emphasis in anorexia, bulimia, binge eating, pica, Rumination Disorder, Avoidant/Restrictive Food Intake Disorder)
- 10) **Elimination disorders** (with an emphasis in Enuresis and Encopresis)
- 11) **Sleep-Wake disorders** [with an emphasis in insomnia, parasomnias (with emphasis in sleepwalking, nightmare disorder, sleep terrors, restless legs syndrome),
- 12) **Gender dysphoria**
- 13) **Impulse-control disorders** (with an emphasis in Oppositional defiant disorder, Intermittent Explosive Disorder and Conduct disorder)
- 14) **Substance-related and addictive disorder**
